# Supplementary material
Source: MDPI journal article supplement (https://www.mdpi.com/1424-8247/16/2/211)
Supplement: s1 [file s1]

## Supplementary Data

Article

# Bio-Oriented synthesis and molecular docking studies of 1,2,4-Triazole based derivatives as potential Anticancer agents against HepG2 Cell Line

Naheed Akhter <sup>1</sup>, Sidra Batool <sup>2</sup>, Samreen Gul Khan <sup>2,\*</sup>, Nasir Rasool <sup>2</sup>, Fozia Anjum <sup>2</sup>, Azhar Rasul <sup>3</sup>, Şevki Adem <sup>4</sup>, Sadaf Mahmood <sup>2</sup>, Aziz-ur-Rehman <sup>5</sup>, Mehr-un-Nisa <sup>6</sup>, Zainib Razzaq<sup>1</sup>, Jørn B. Christensen <sup>7</sup>, Mohammed A.S Abourehab <sup>8</sup>, Syed Adnan Ali Shah <sup>9,10\*</sup>, Syahrul Imran <sup>10,11</sup>.

<sup>1</sup> Department of Biochemistry, Faculty of Life Science, Government College University Faisalabad, Faisalabad 38000, Pakistan

<sup>2</sup> Department of Chemistry, Drug Design and Medicinal Chemistry Laboratory, Faculty of Physical Science, Government College University, Faisalabad 38000, Pakistan

<sup>3</sup> Department of Zoology, Faculty of Life Sciences, Government College University Faisalabad, Faisalabad 38000, Pakistan

<sup>4</sup> Department of Chemistry, Faculty of Sciences, Çankırı Karatekin University, 18100 Çankırı, Turkey

<sup>5</sup> Department of Chemistry, Government College University, Lahore 54000, Pakistan

<sup>6</sup> Department of Chemistry, University of Lahore, Lahore 40100, Pakistan

<sup>7</sup> Department of Chemistry, Faculty of Science, University of Copenhagen, 2100 Copenhagen, Denmark

<sup>8</sup> Department of Pharmaceutics College of Pharmacy, Umm Al-Qura University, Makkah 21955, Saudi Arabia

<sup>9</sup> Faculty of Pharmacy, Universiti Teknologi MARA Cawangan Selangor Kampus Puncak Alam, Bandar Puncak Alam 42300, Selangor D. E., Malaysia

<sup>10</sup> Atta-ur-Rahman Institute for Natural Product Discovery (AuRIns), Universiti Teknologi MARA Cawangan Selangor Kampus Puncak Alam, Bandar Puncak Alam 42300, Selangor D. E., Malaysia

<sup>11</sup> Faculty of Applied Sciences, Universiti Teknologi MARA Shah Alam, Shah Alam 40450, Selangor D.E., Malaysia

\* Correspondence: samreengul@gcuf.edu (S.G.K.); syedadnan@uitm.edu.my (S.A.A.S.); Tel.: +92-300-427-0077 (S.G.K.); +60-3-3258-4616 or +60-19365-1307 (S.A.A.S.)

## Table of Contents:

|                                                                                          |    |
|------------------------------------------------------------------------------------------|----|
| <b>Figure S1:</b> $^1\text{H}$ NMR spectrum of compound <b>2</b> (Full spectrum).....    | 3  |
| <b>Figure S2:</b> $^1\text{H}$ NMR spectrum of compound <b>3</b> (Full spectrum).....    | 3  |
| <b>Figure S3:</b> $^1\text{H}$ NMR spectrum of compound <b>4</b> (Full spectrum).....    | 4  |
| <b>Figure S4:</b> $^1\text{H}$ NMR spectrum of compound <b>4</b> (aromatic region).....  | 4  |
| <b>Figure S5:</b> $^1\text{H}$ NMR spectrum of compound <b>4</b> (aliphatic region)..... | 5  |
| <b>Figure S6:</b> $^{13}\text{C}$ NMR spectrum of compound <b>2</b> .....                | 5  |
| <b>Figure S7:</b> $^{13}\text{C}$ NMR spectrum of compound <b>3</b> .....                | 6  |
| <b>Figure S8:</b> $^{13}\text{C}$ NMR spectrum of compound <b>4</b> .....                | 6  |
| <b>Figure S9:</b> $^1\text{H}$ NMR spectrum of compound <b>7a</b> .....                  | 7  |
| <b>Figure S10:</b> COSY- $^1\text{H}$ NMR spectrum of compound <b>7a</b> .....           | 7  |
| <b>Figure S11:</b> $^{13}\text{C}$ NMR spectrum of compound <b>7a</b> .....              | 8  |
| <b>Figure S12:</b> $^1\text{H}$ NMR spectrum of compound <b>7b</b> .....                 | 8  |
| <b>Figure S13:</b> COSY- $^1\text{H}$ NMR spectrum of compound <b>7b</b> .....           | 9  |
| <b>Figure S14:</b> $^{13}\text{C}$ NMR spectrum of compound <b>7b</b> .....              | 9  |
| <b>Figure S15:</b> $^1\text{H}$ NMR spectrum of compound <b>7c</b> .....                 | 10 |
| <b>Figure S16:</b> COSY- $^1\text{H}$ NMR spectrum of compound <b>7c</b> .....           | 10 |
| <b>Figure S17:</b> $^{13}\text{C}$ NMR spectrum of compound <b>7b</b> .....              | 11 |
| <b>Figure S18:</b> $^1\text{H}$ NMR spectrum of compound <b>7d</b> .....                 | 11 |
| <b>Figure S19:</b> COSY $^1\text{H}$ NMR spectrum of compound <b>7d</b> .....            | 12 |
| <b>Figure S20:</b> $^{13}\text{C}$ NMR spectrum of compound <b>7d</b> .....              | 12 |
| <b>Figure S21:</b> $^1\text{H}$ NMR spectrum of compound <b>7e</b> .....                 | 13 |
| <b>Figure S22:</b> COSY $^1\text{H}$ NMR spectrum of compound <b>7e</b> .....            | 13 |
| <b>Figure S23:</b> $^{13}\text{C}$ NMR spectrum of compound <b>7d</b> .....              | 14 |
| <b>Figure S24:</b> $^1\text{H}$ NMR spectrum of compound <b>7f</b> .....                 | 14 |
| <b>Figure S25:</b> COSY $^1\text{H}$ NMR spectrum of compound <b>7f</b> .....            | 15 |
| <b>Figure S26:</b> $^{13}\text{C}$ NMR spectrum of compound <b>7f</b> .....              | 15 |
| <b>Figure S27:</b> HRMS spectrum of compound <b>7a</b> .....                             | 16 |
| <b>Figure S28:</b> HRMS spectrum of compound <b>7b</b> .....                             | 17 |
| <b>Figure S29:</b> HRMS spectrum of compound <b>7c</b> .....                             | 18 |
| <b>Figure S30:</b> HRMS spectrum of compound <b>7d</b> .....                             | 19 |
| <b>Figure S31:</b> HRMS spectrum of compound <b>7e</b> .....                             | 20 |
| <b>Figure S32:</b> HRMS spectrum of compound <b>7f</b> .....                             | 21 |

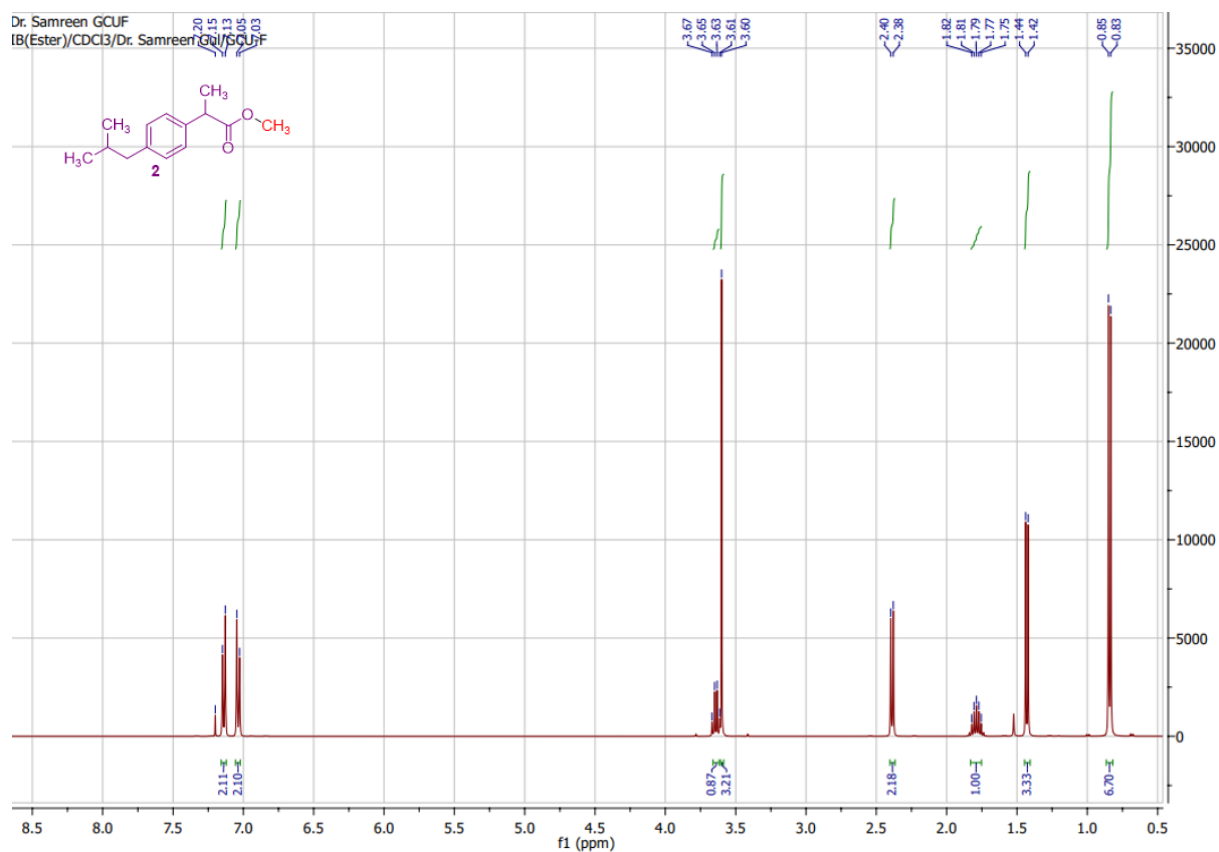

**Figure S1:** <sup>1</sup>H NMR spectrum of compound 2 (Full)

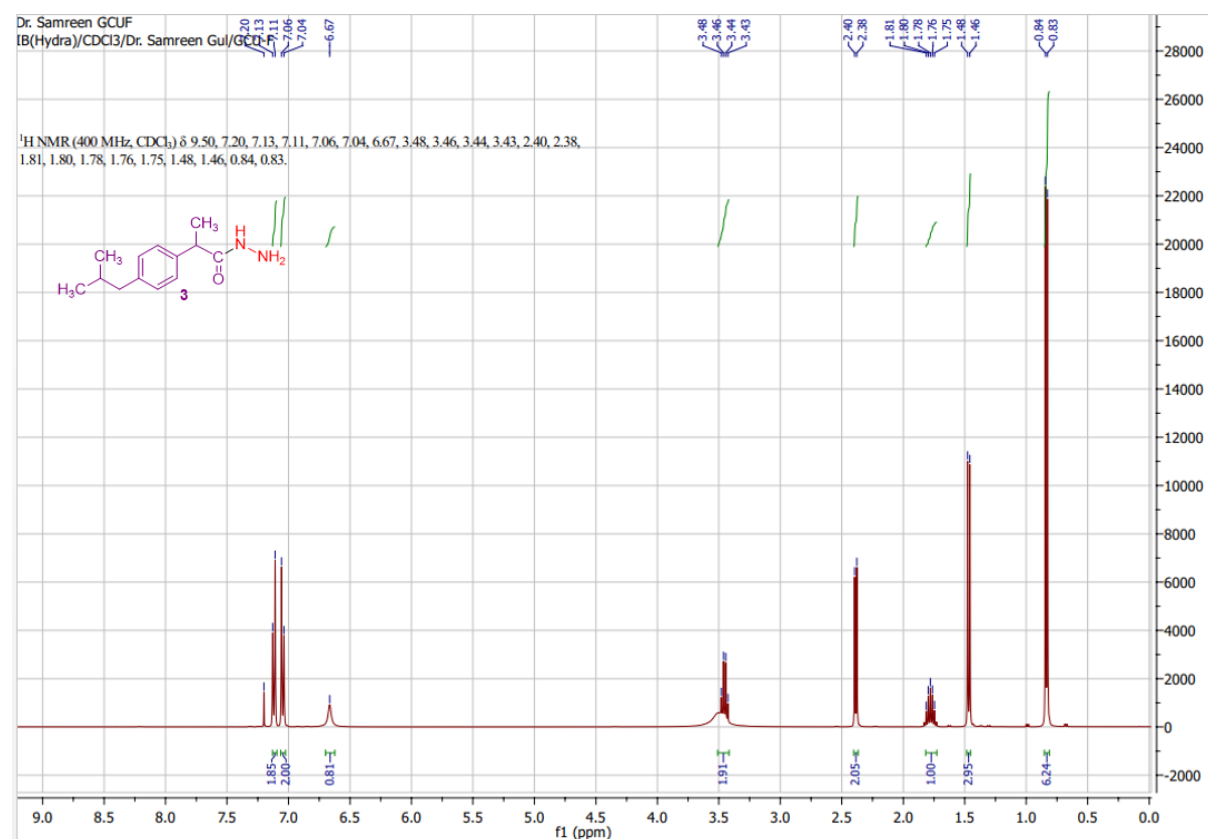

**Figure S2:** <sup>1</sup>H NMR spectrum of compound 3 (Full)

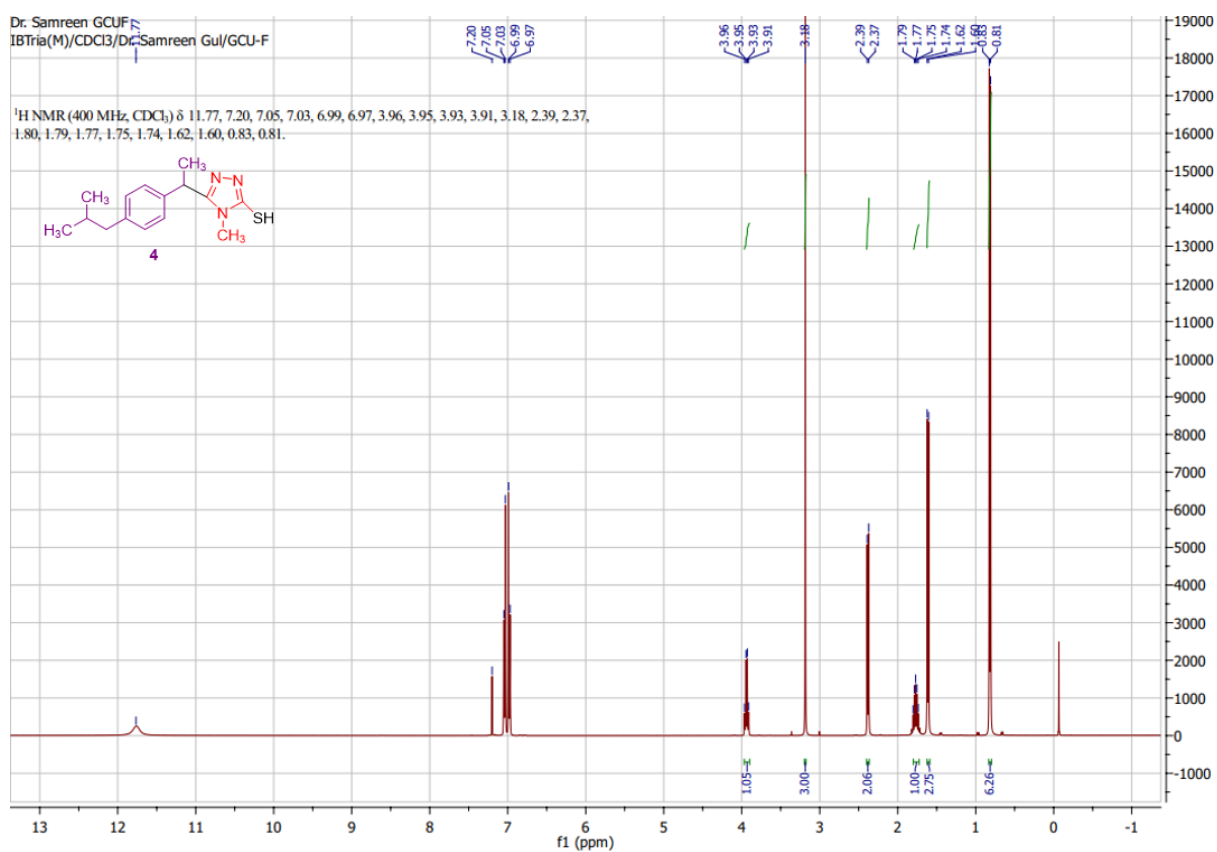

**Figure S3:** <sup>1</sup>H NMR spectrum of compound 4(Full)

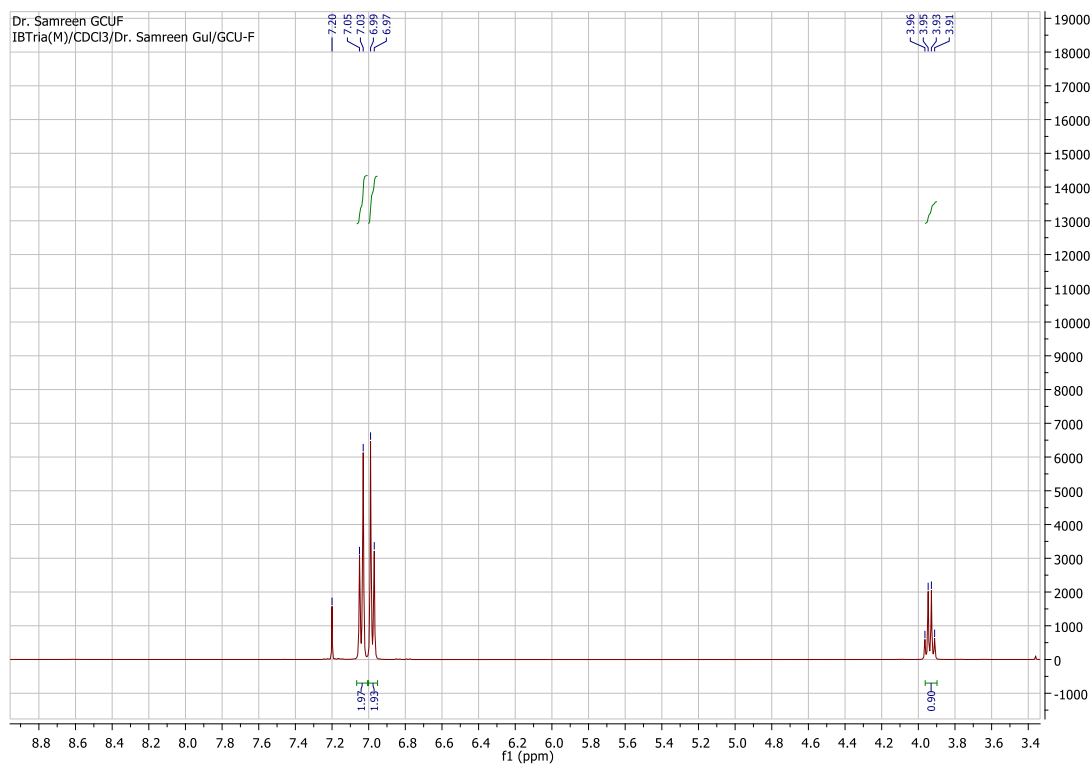

**Figure S4.** <sup>1</sup>H NMR spectrum of compound 4 (aromatic region)

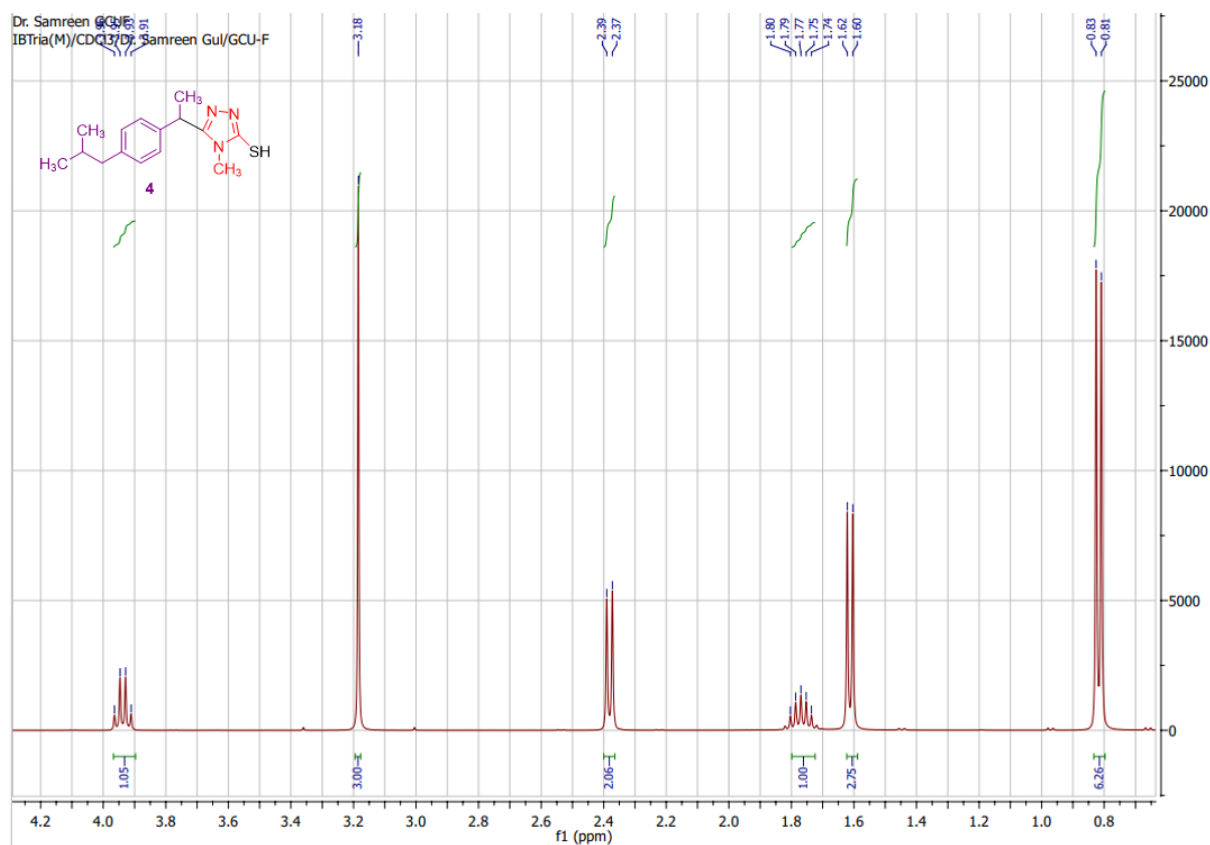

**Figure S5.** <sup>1</sup>H NMR spectrum of compound 4 (aliphatic region)

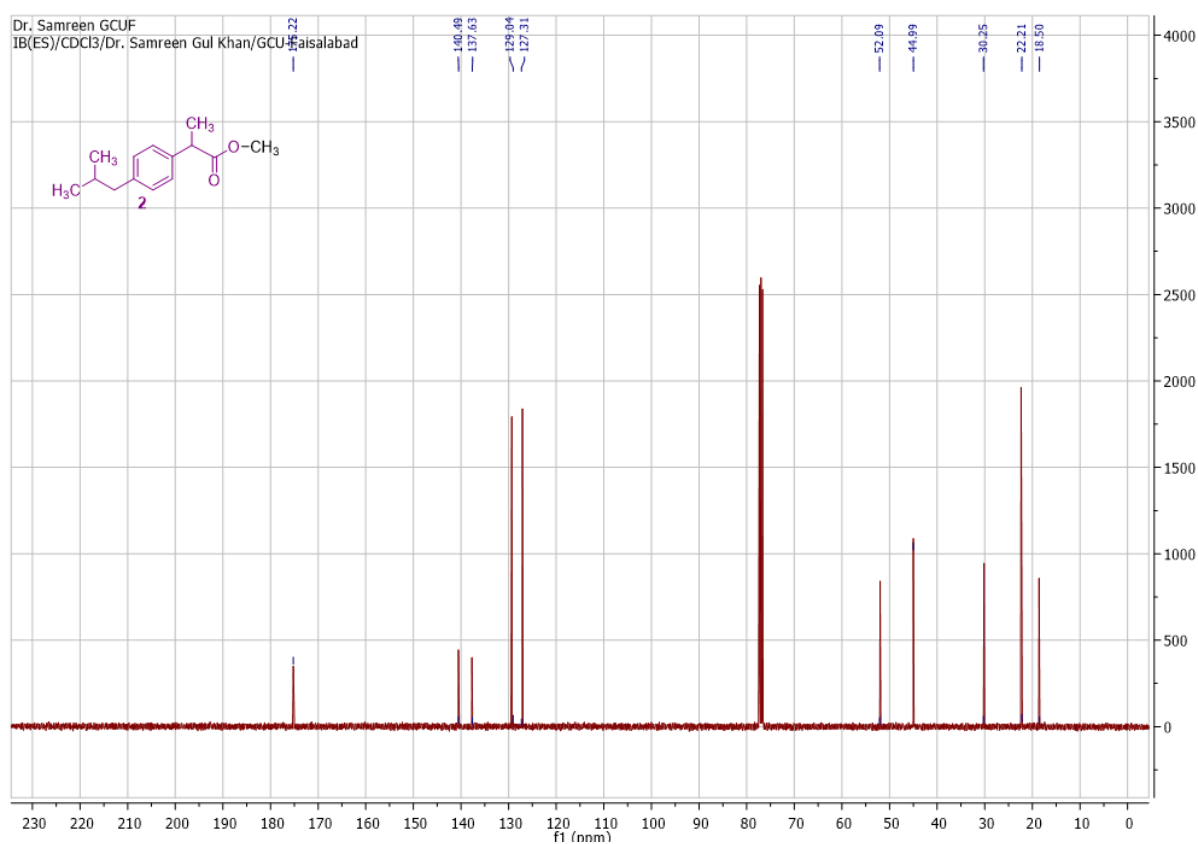

**Figure S6.** <sup>13</sup>C NMR spectrum of compound 2

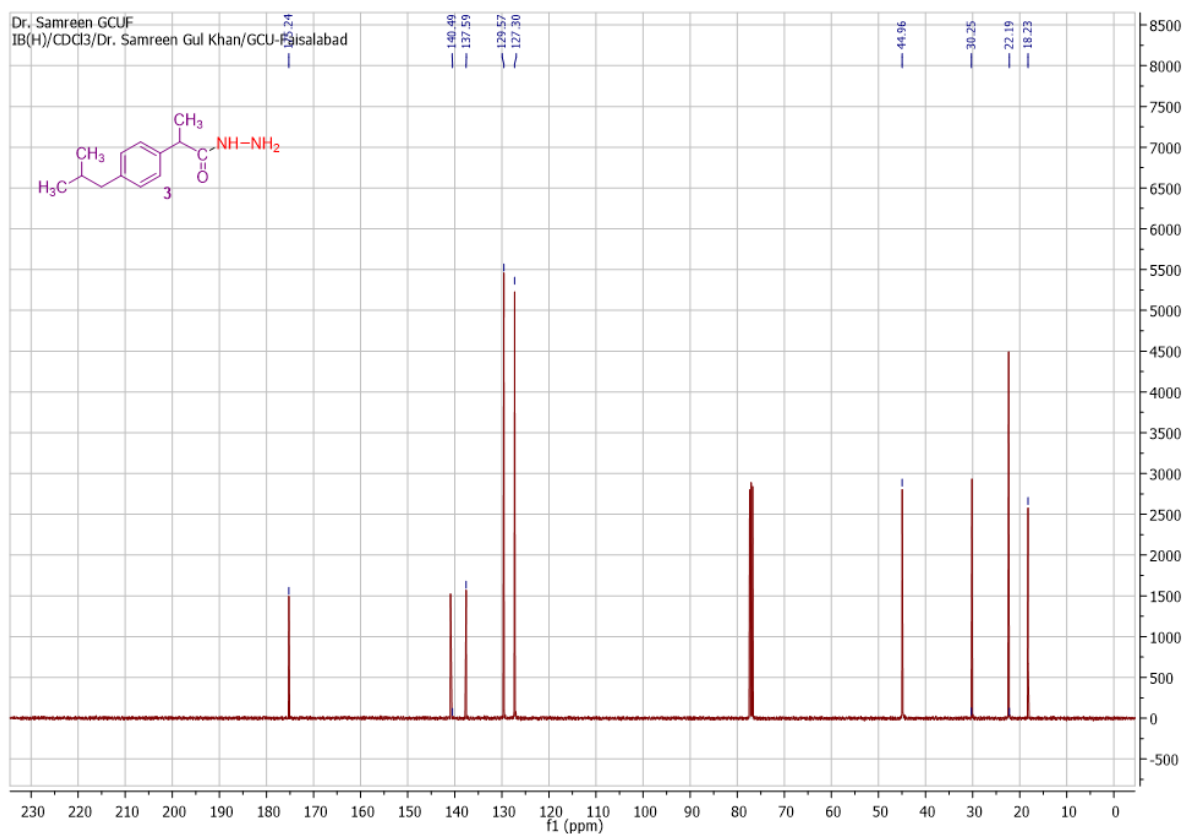

**Figure S7.** <sup>13</sup>C NMR spectrum of compound 3

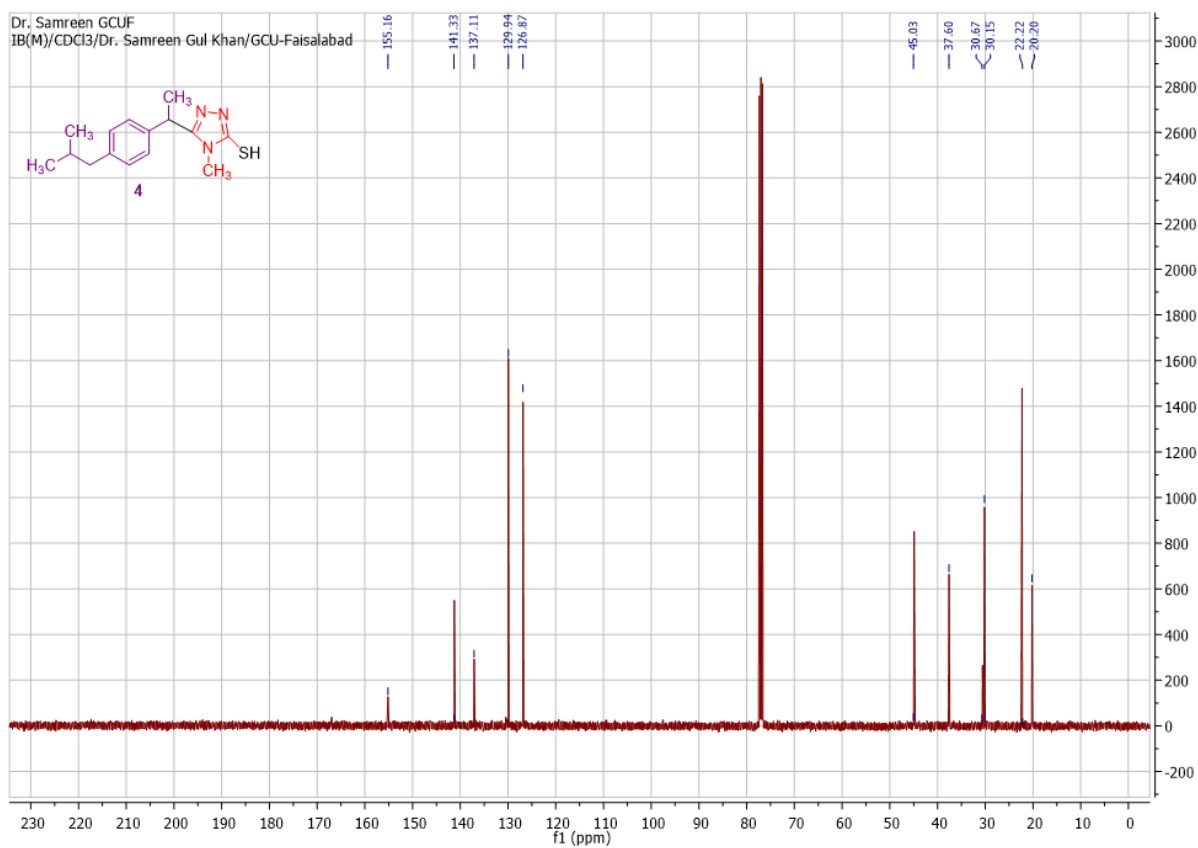

**Figure S8.** <sup>13</sup>C NMR spectrum of compound 4

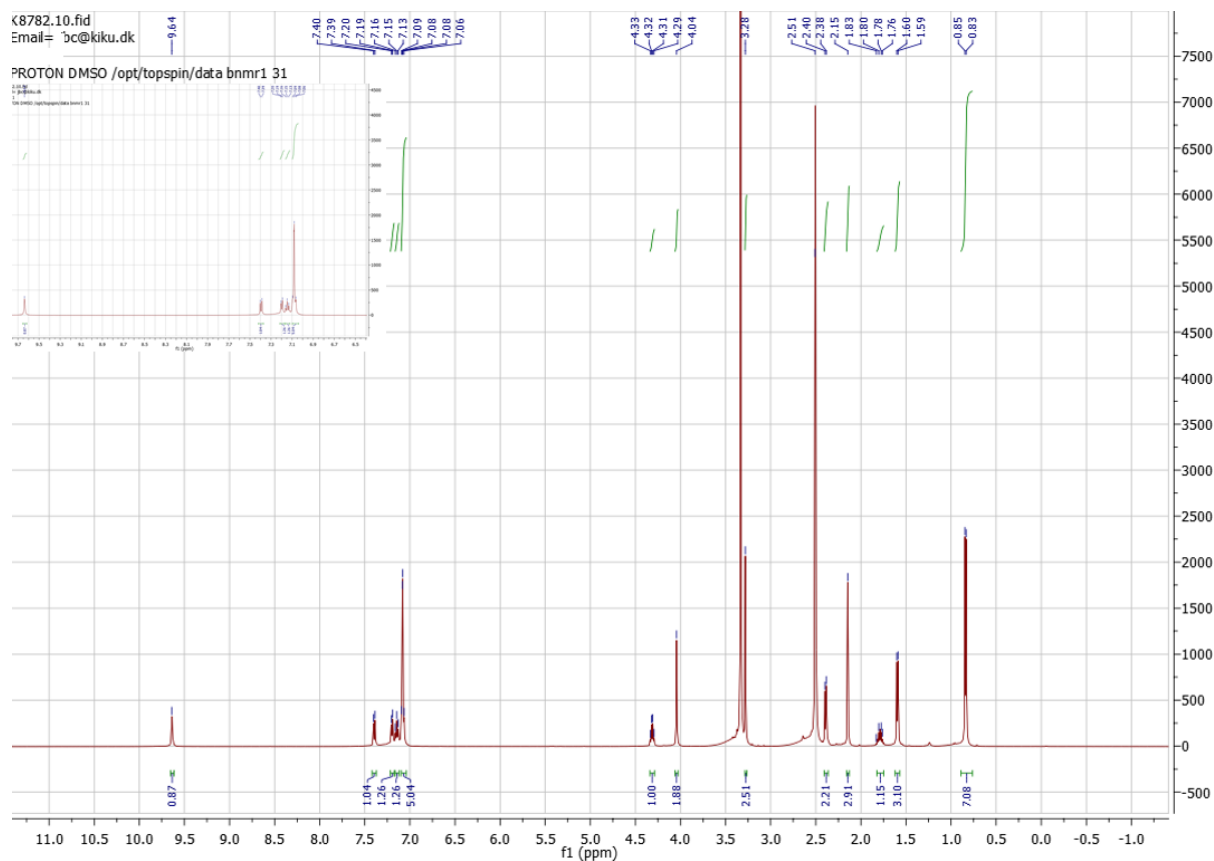

**Figure S9:**  $^1\text{H}$  NMR spectrum of compound **7a** (Full)

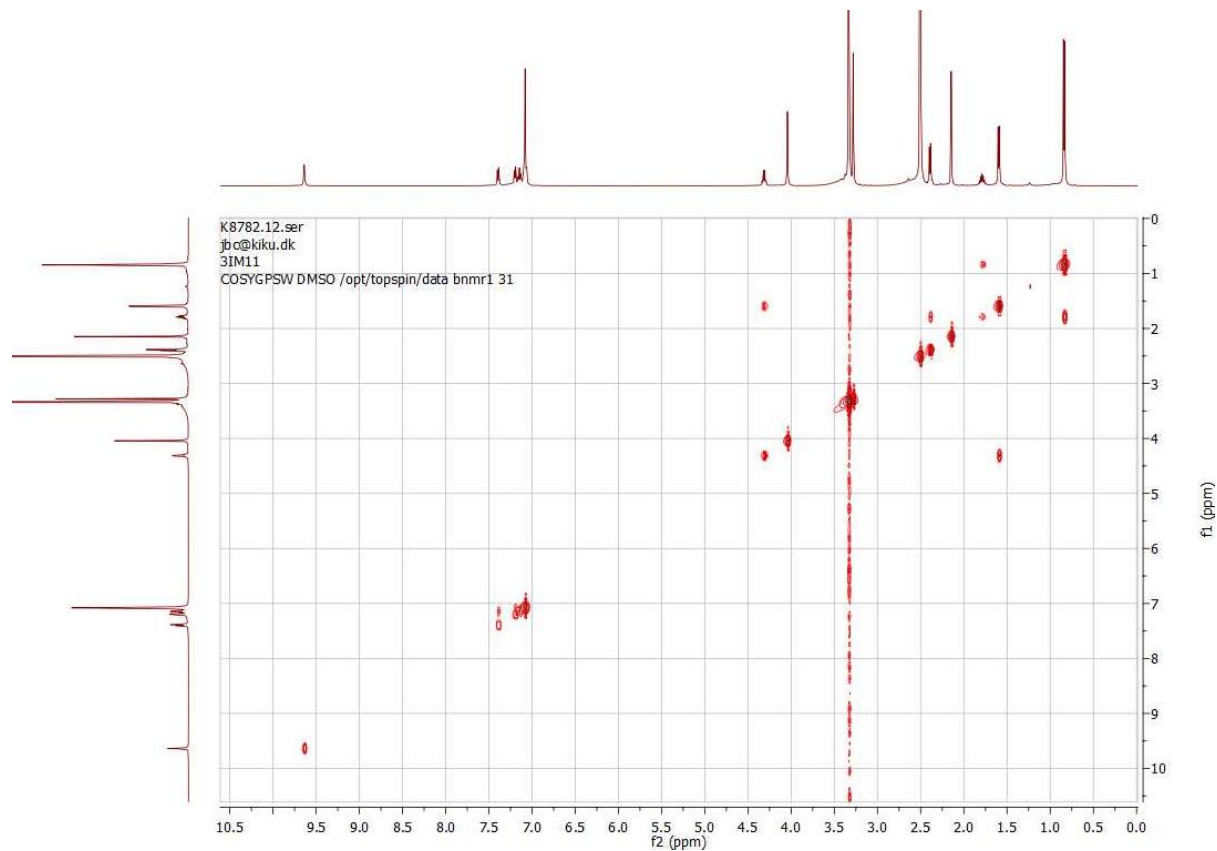

**Figure S10.** COSY- $^1\text{H}$  NMR spectrum of compound **7a**

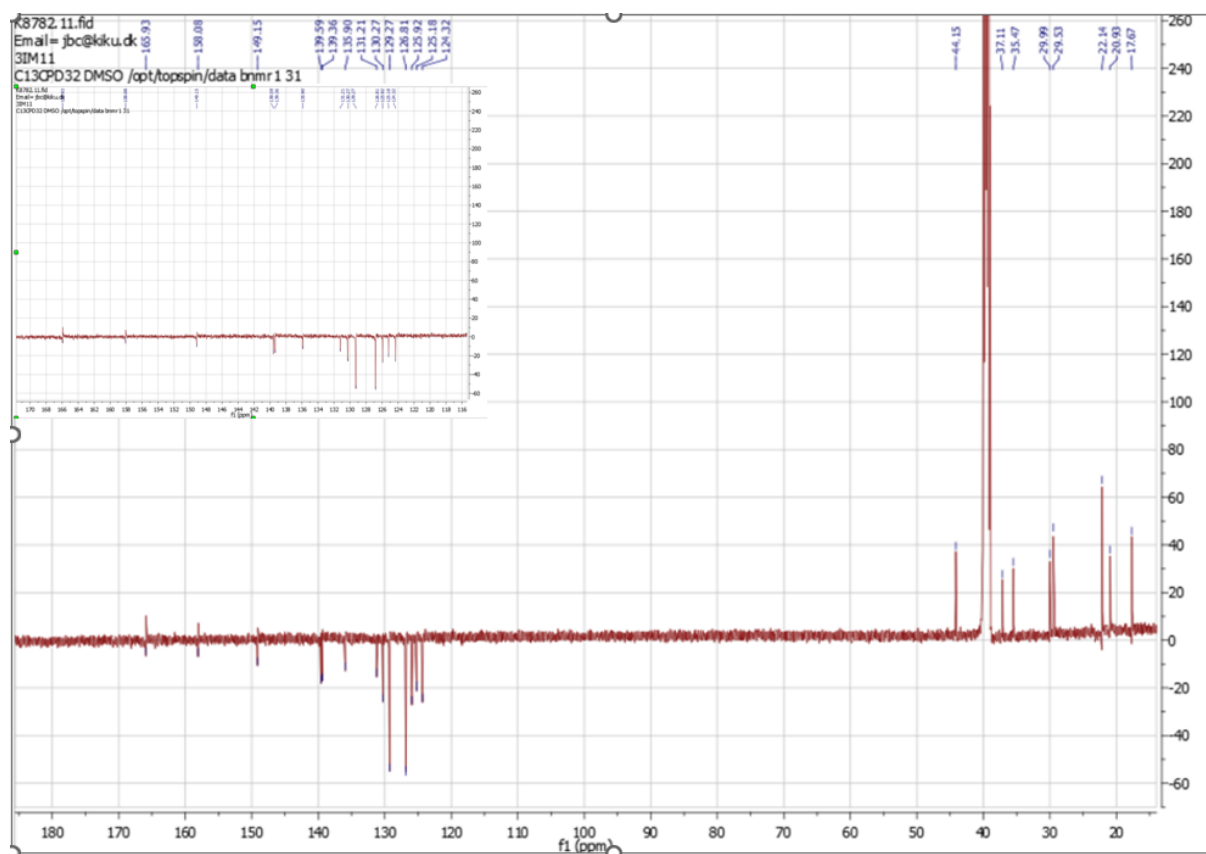

**Figure S11.**  $^{13}\text{C}$  NMR spectrum of compound **7a** (Full spectrum)

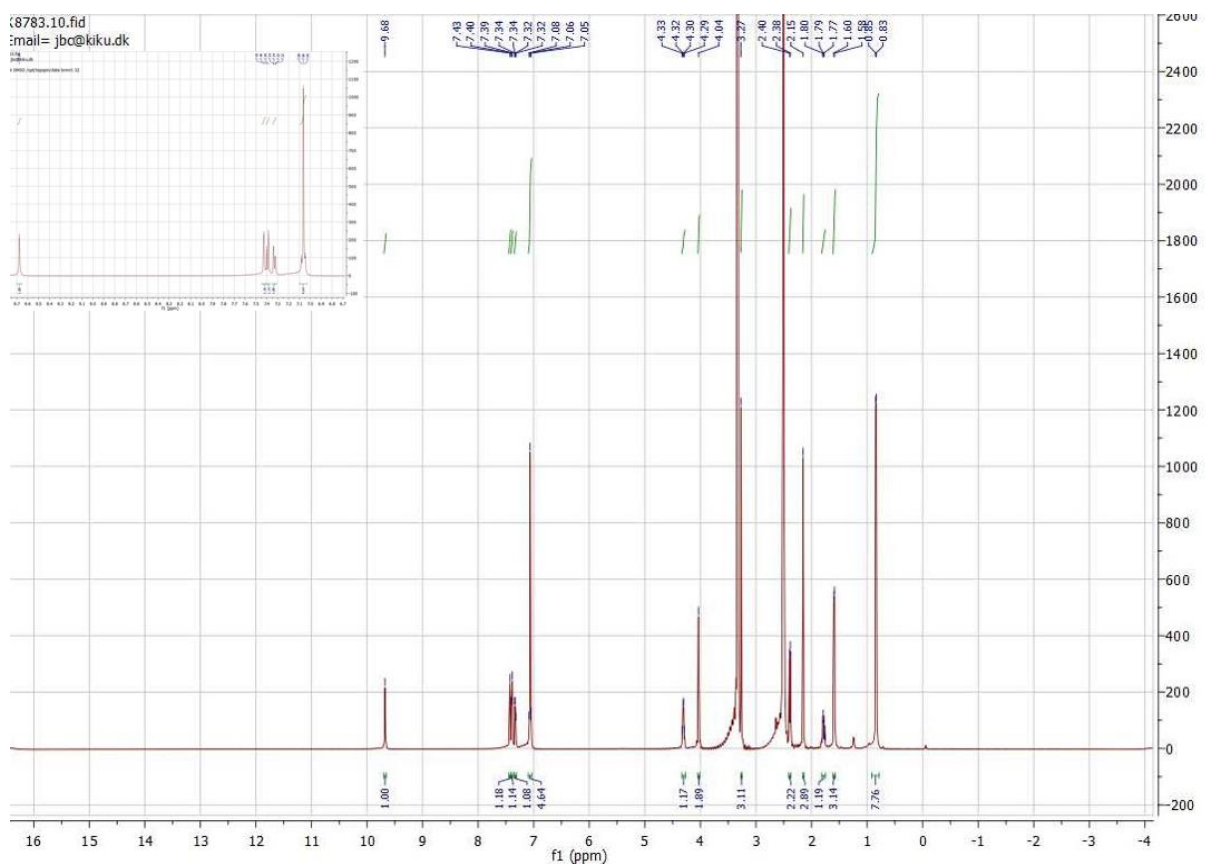

**Figure S12.**  $^1\text{H}$  NMR spectrum of compound **7b** (Full)



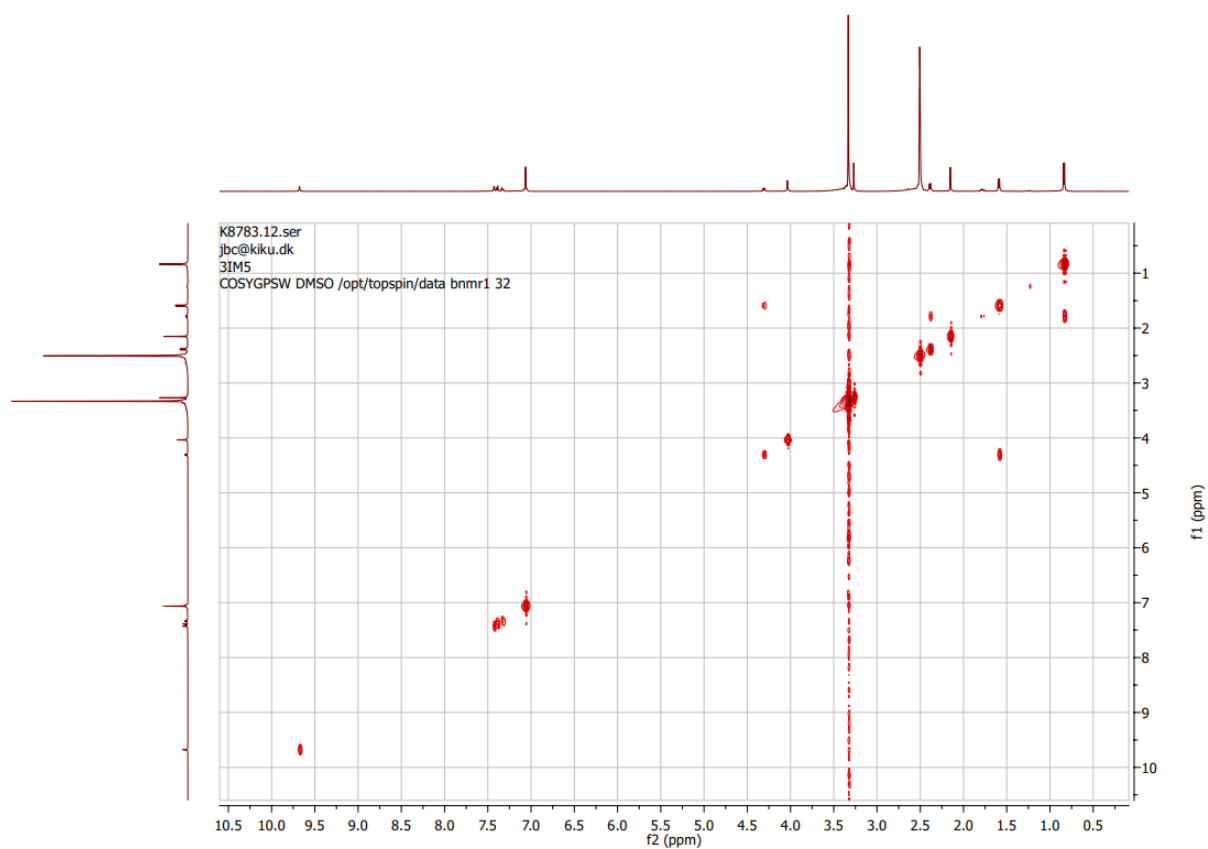

**Figure S13.** COSY- $^1\text{H}$  NMR spectrum of compound **7b**

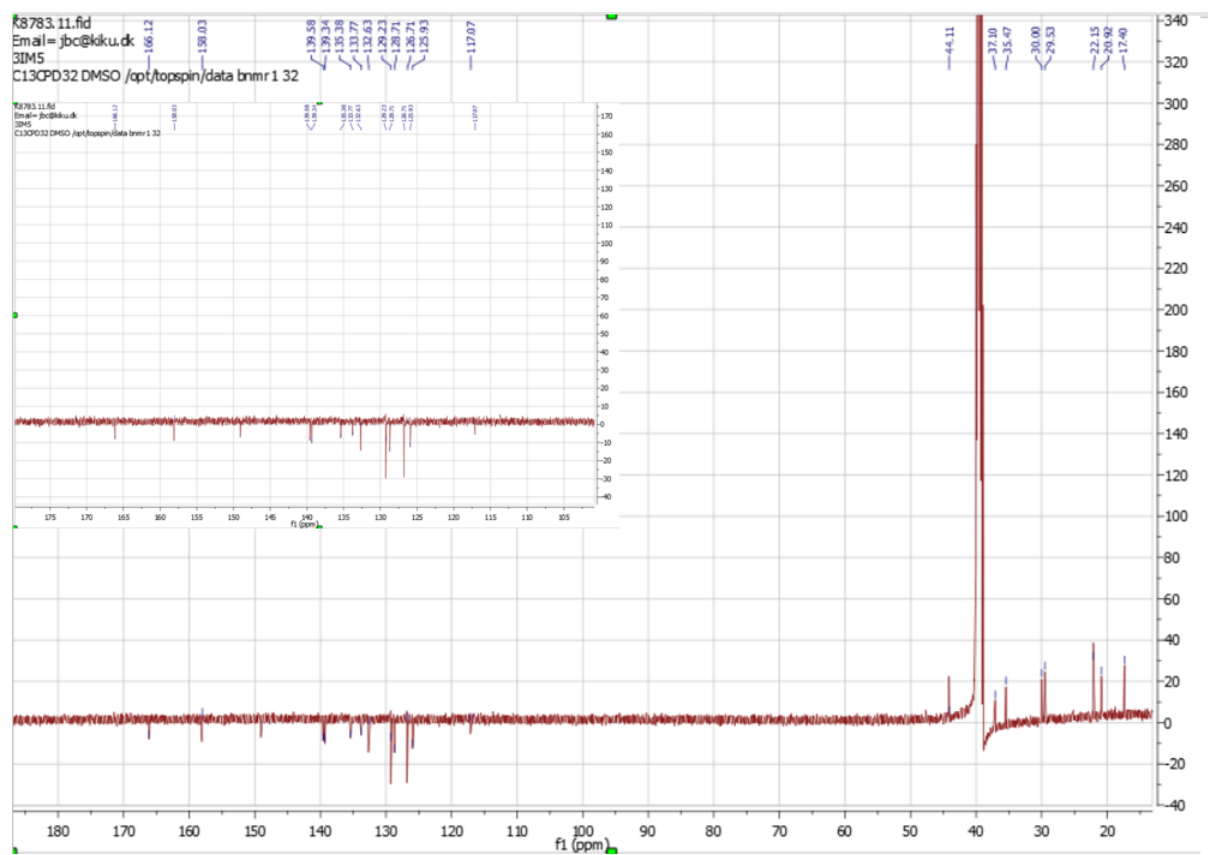

**Figure S14.**  $^{13}\text{C}$  NMR spectrum of compound **7b** (Full spectrum)

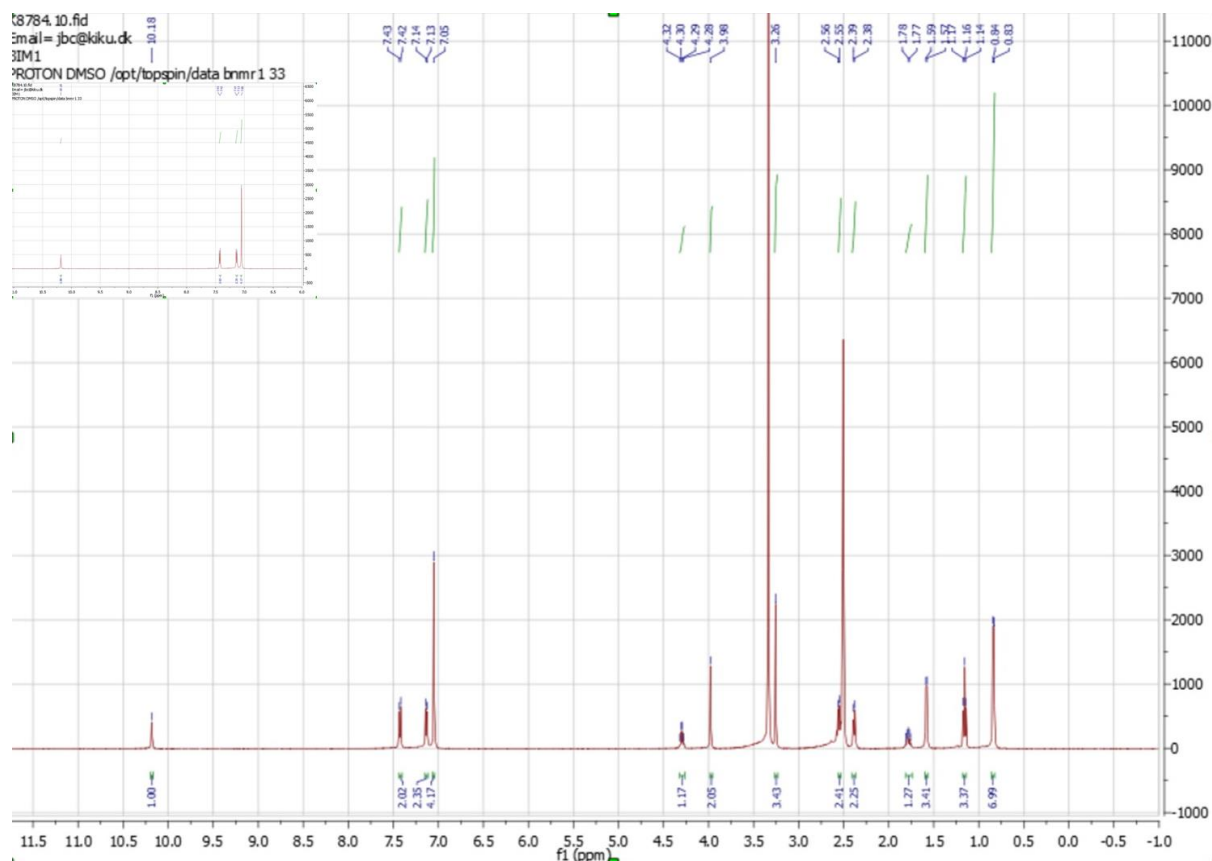

**Figure S15.**  $^1\text{H}$  NMR spectrum of compound **7c** (Full spectrum)

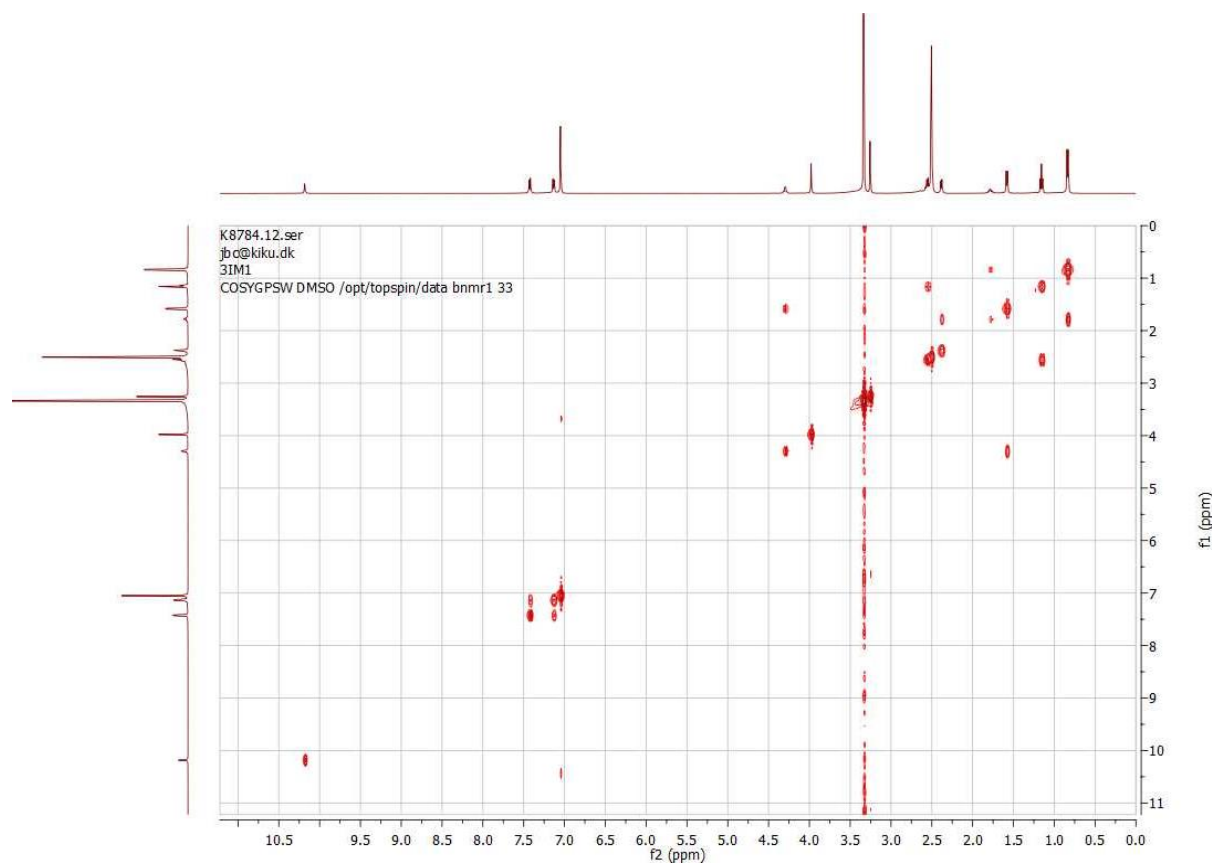

**Figure S16.** COSY  $^1\text{H}$  NMR spectrum of compound **7c**

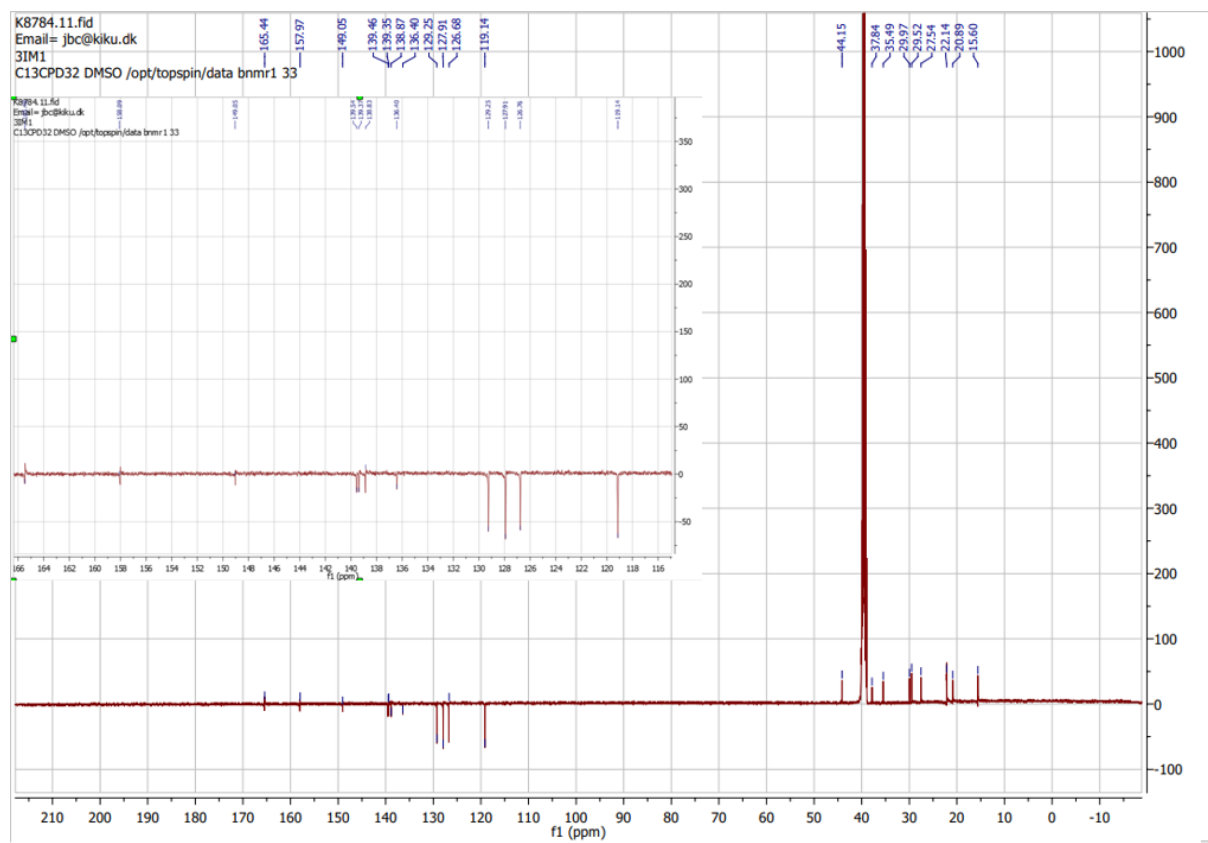

Figure S17.  $^{13}\text{C}$  NMR spectrum of compound **7c** (Full spectrum)

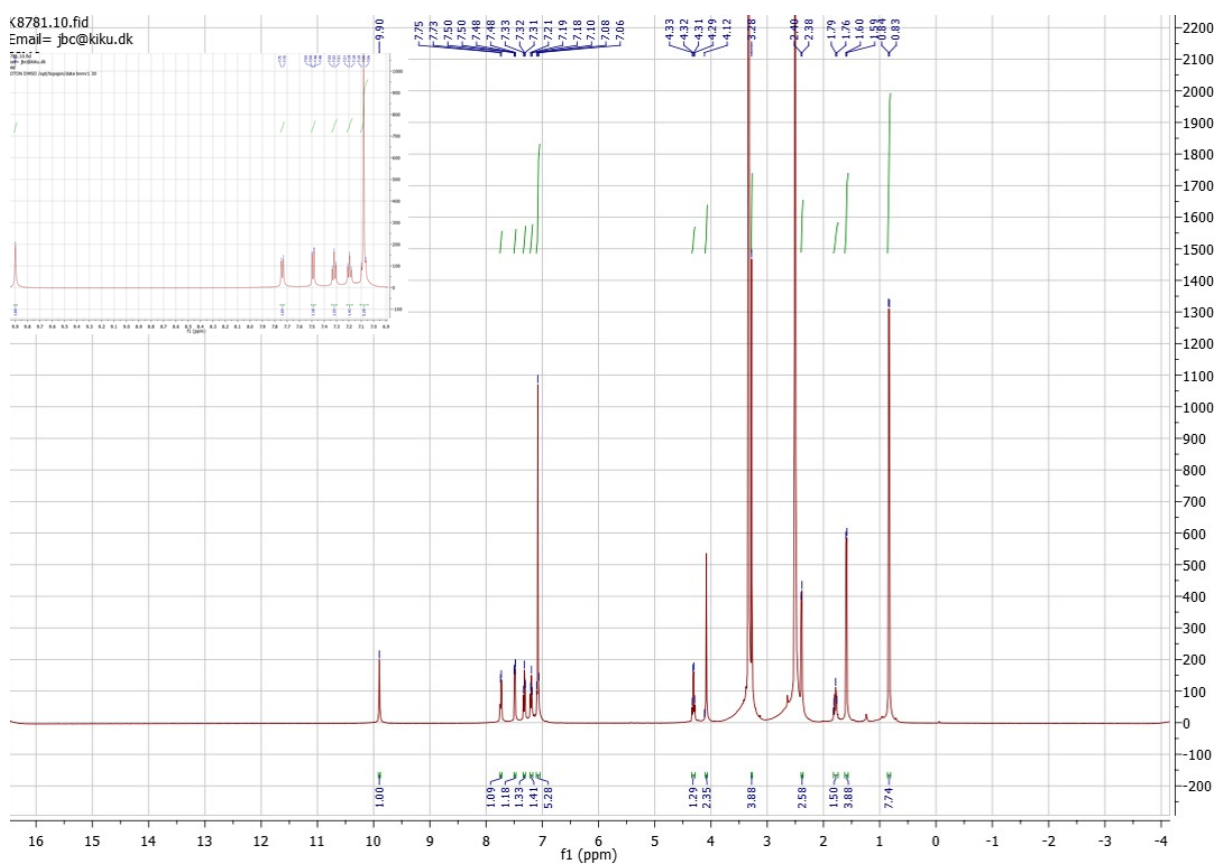

Figure S18:  $^1\text{H}$  NMR spectrum of compound **7d** (Full spectrum)

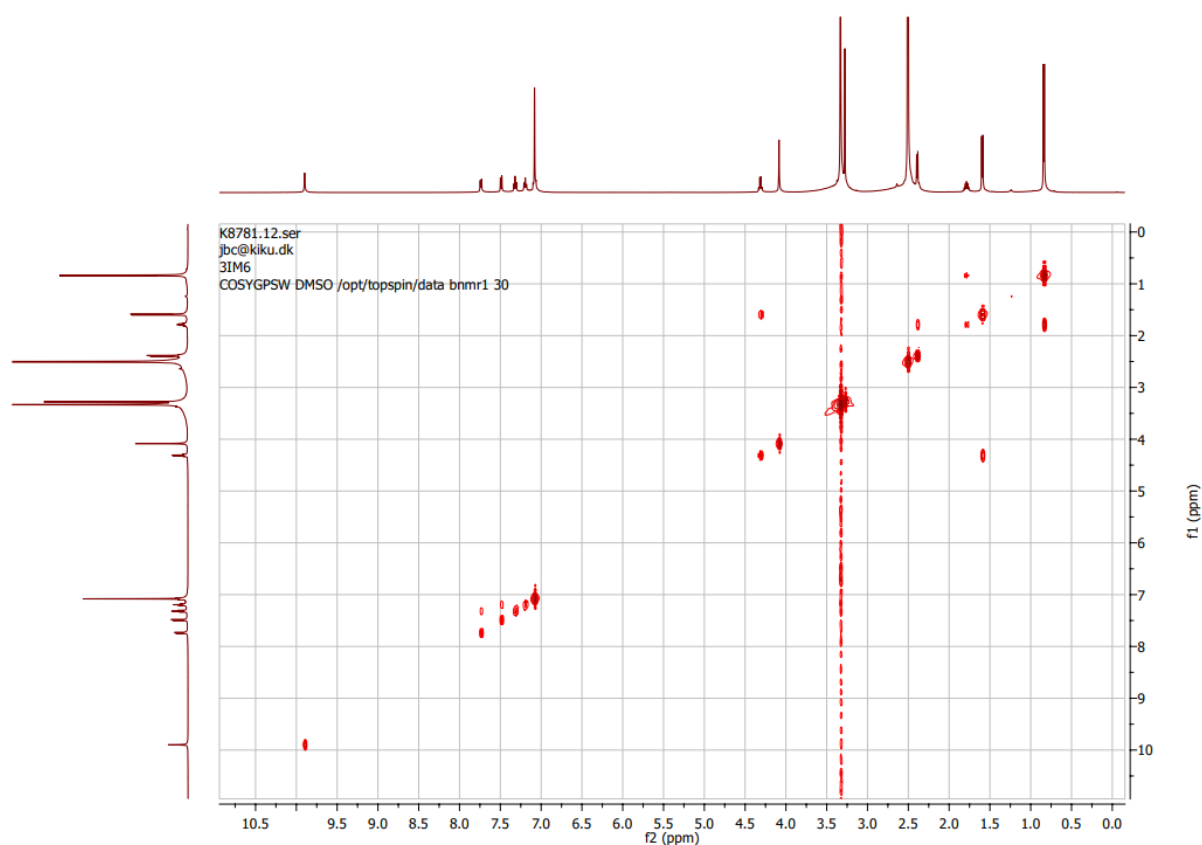

**Figure S19.** COSY- $^1\text{H}$  NMR spectrum of compound **7d**

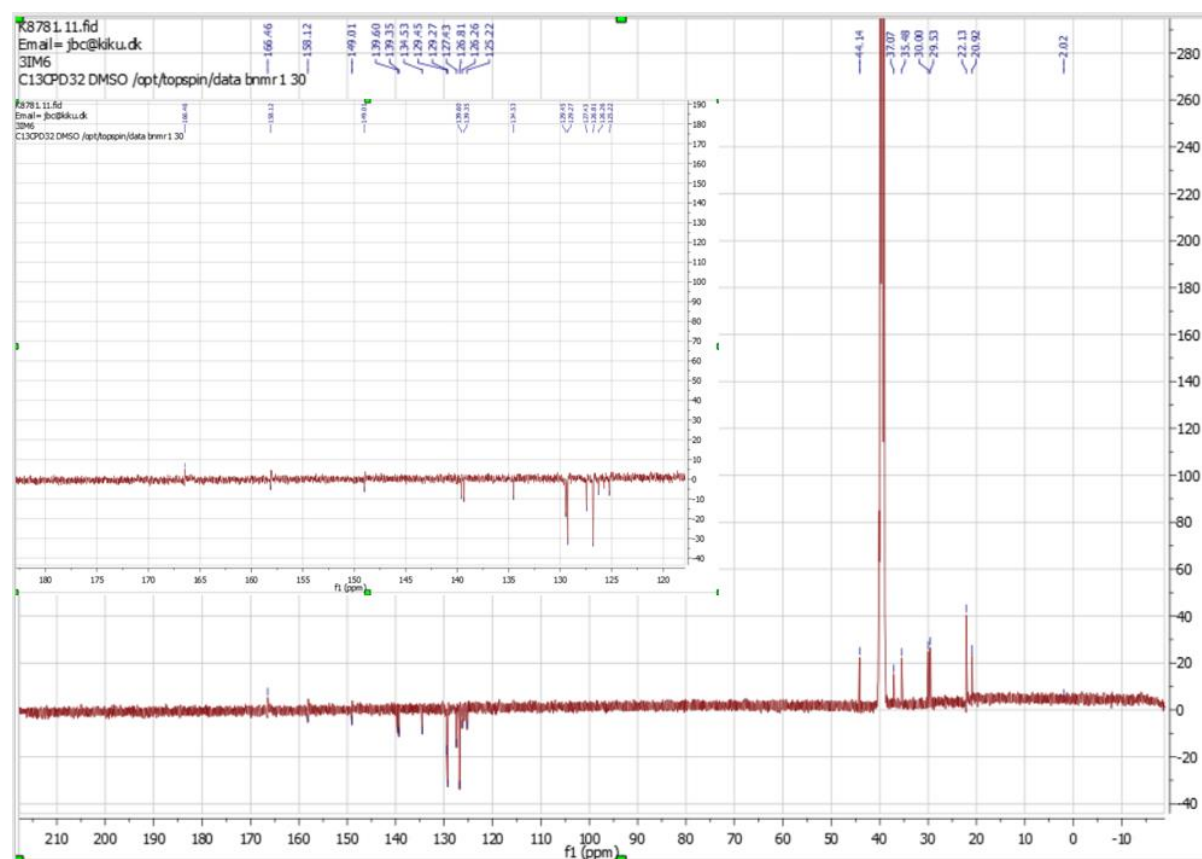

**Figure S20.**  $^{13}\text{C}$  NMR spectrum of compound **7d** (Full spectrum)

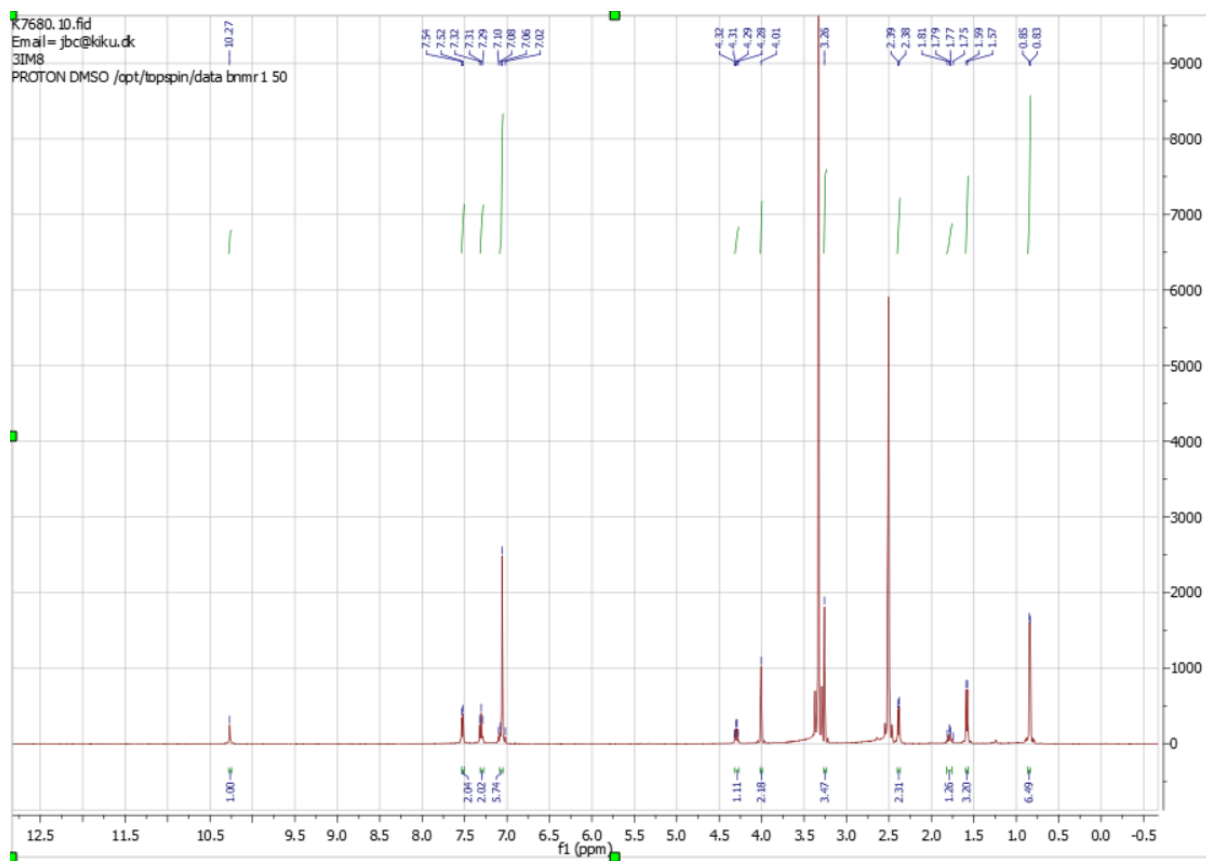

**Figure S21:**  $^1\text{H}$  NMR spectrum of compound **7e** (Full)

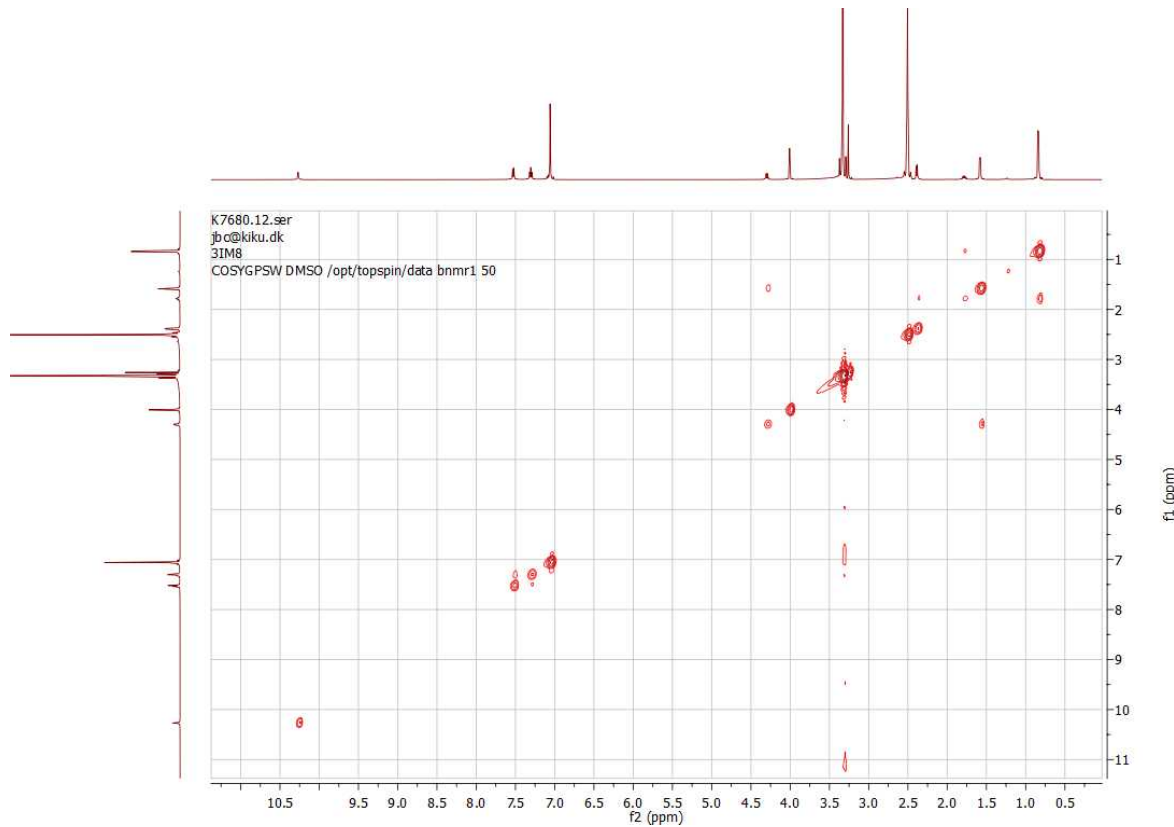

**Figure S22.** COSY- $^1\text{H}$  NMR spectrum of compound **7e**

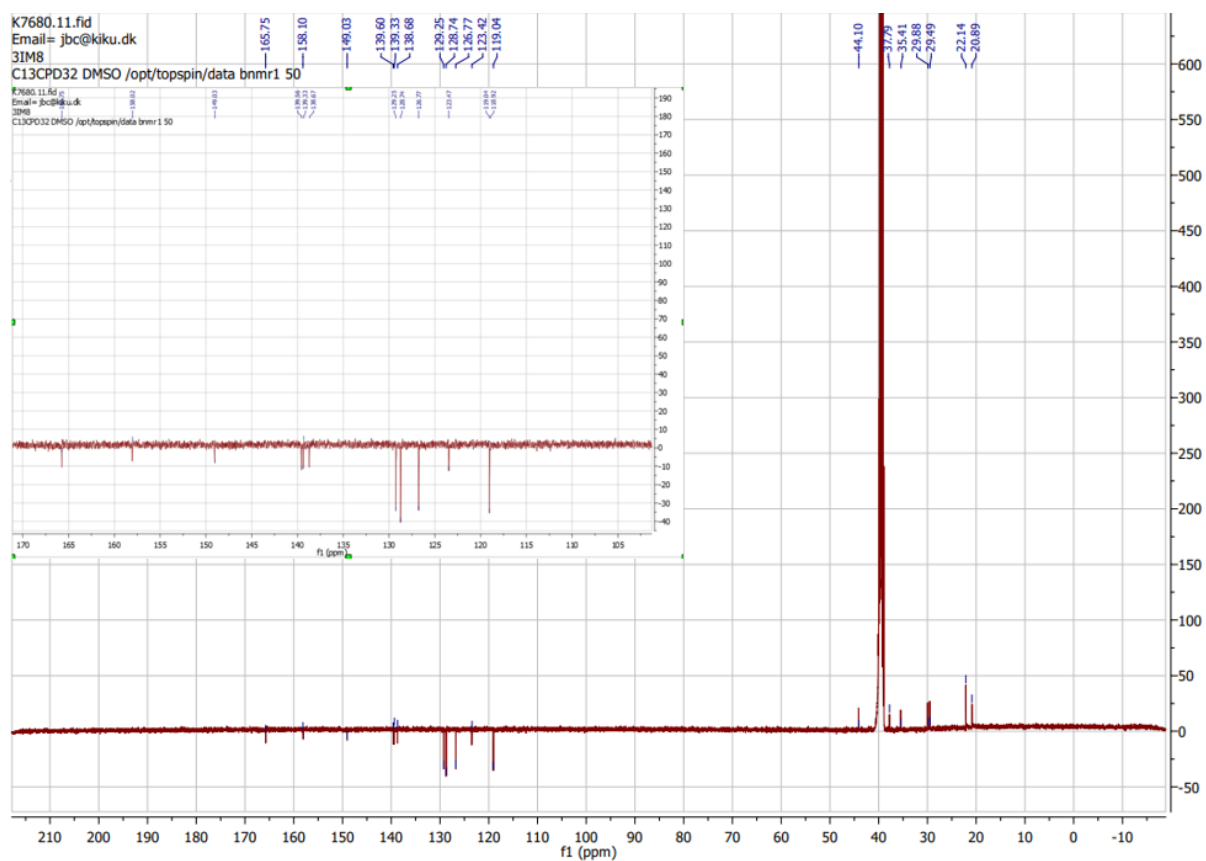

**Figure S23.**  $^{13}\text{C}$  NMR spectrum of compound **7e** (Full spectrum)

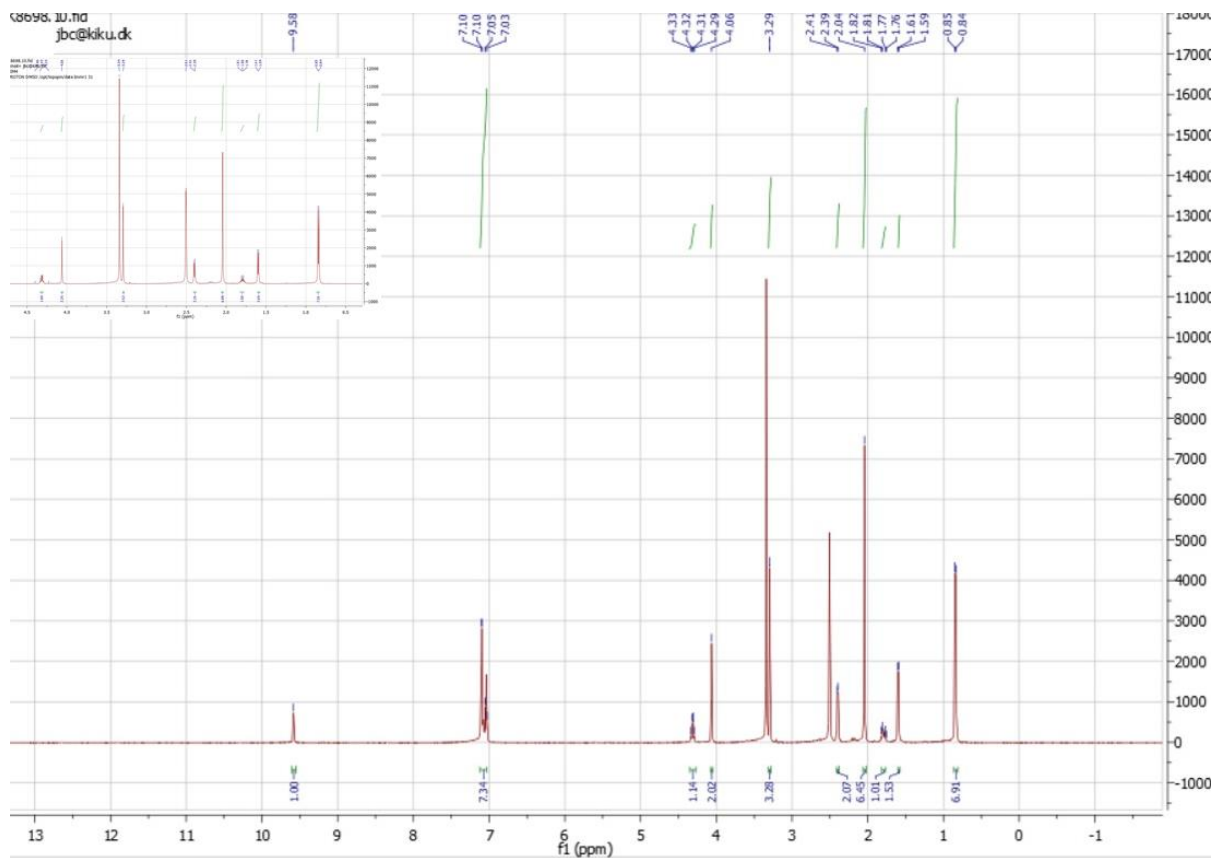

**Figure S24:**  $^1\text{H}$  NMR spectrum of compound **7f** (Full)

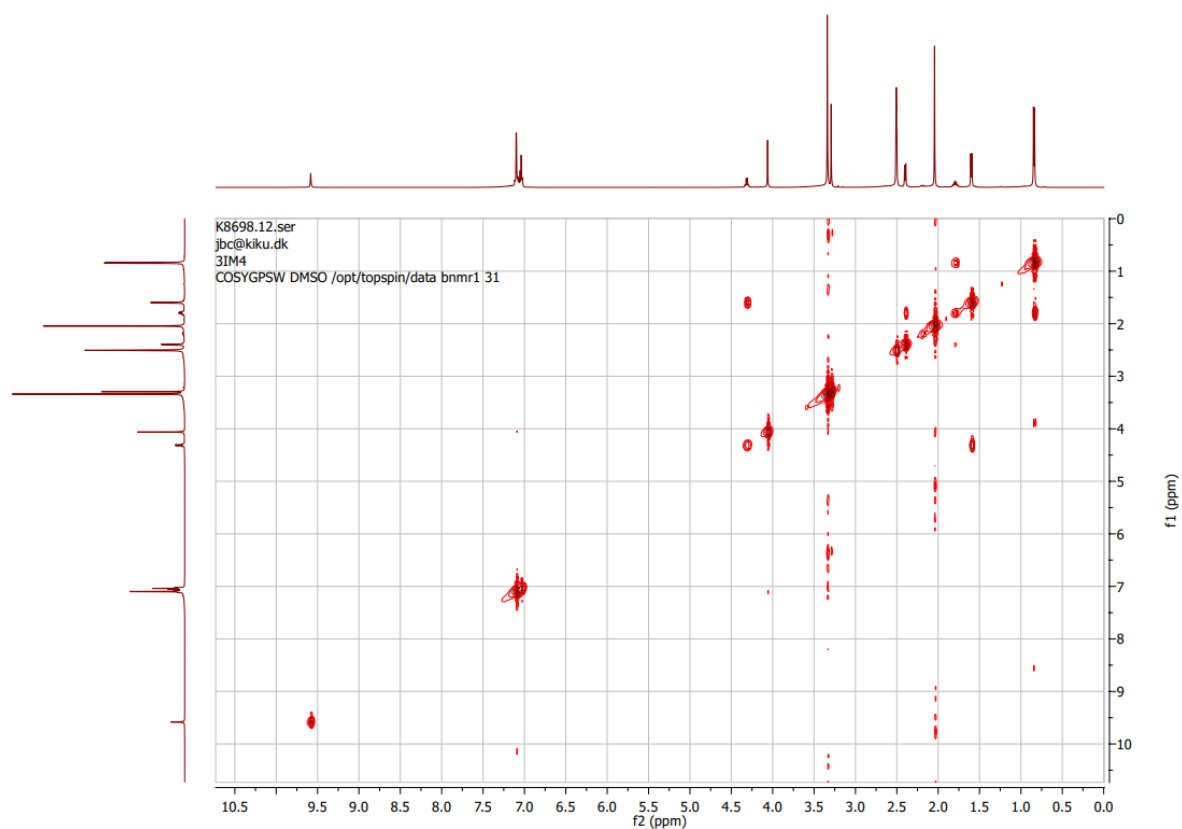

**Figure S25.** COSY-  $^1\text{H}$  NMR spectrum of compound **7f**

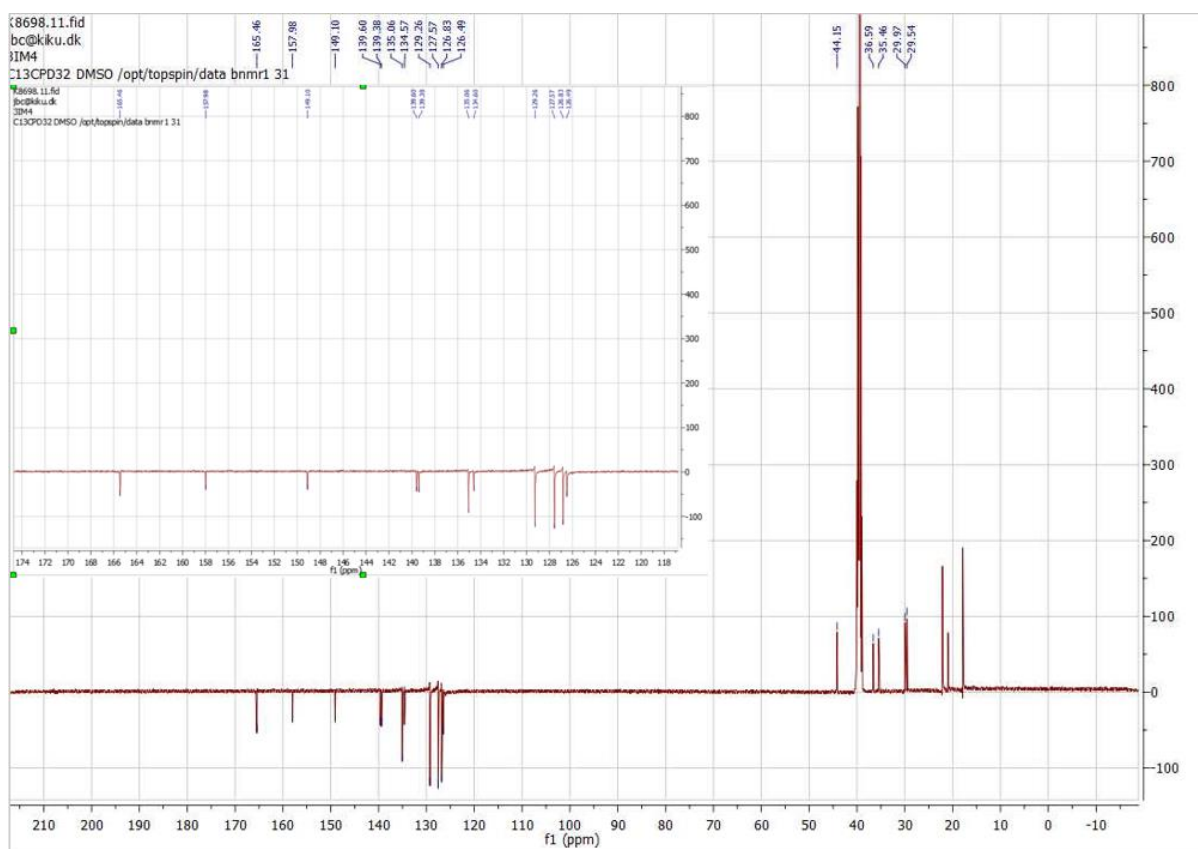

**Figure 26.**  $^{13}\text{C}$  NMR spectrum of compound **7f** (Full spectrum)

## Generic Display Report

### Analysis Info

Analysis Name S:\fticr0\ro\analyser-routine\acq21198\_0\_H1\_000001.d  
Method 10800  
Sample Name  
Comment

Acquisition Date 7/6/2022

Operator  
Instrument solariX XR

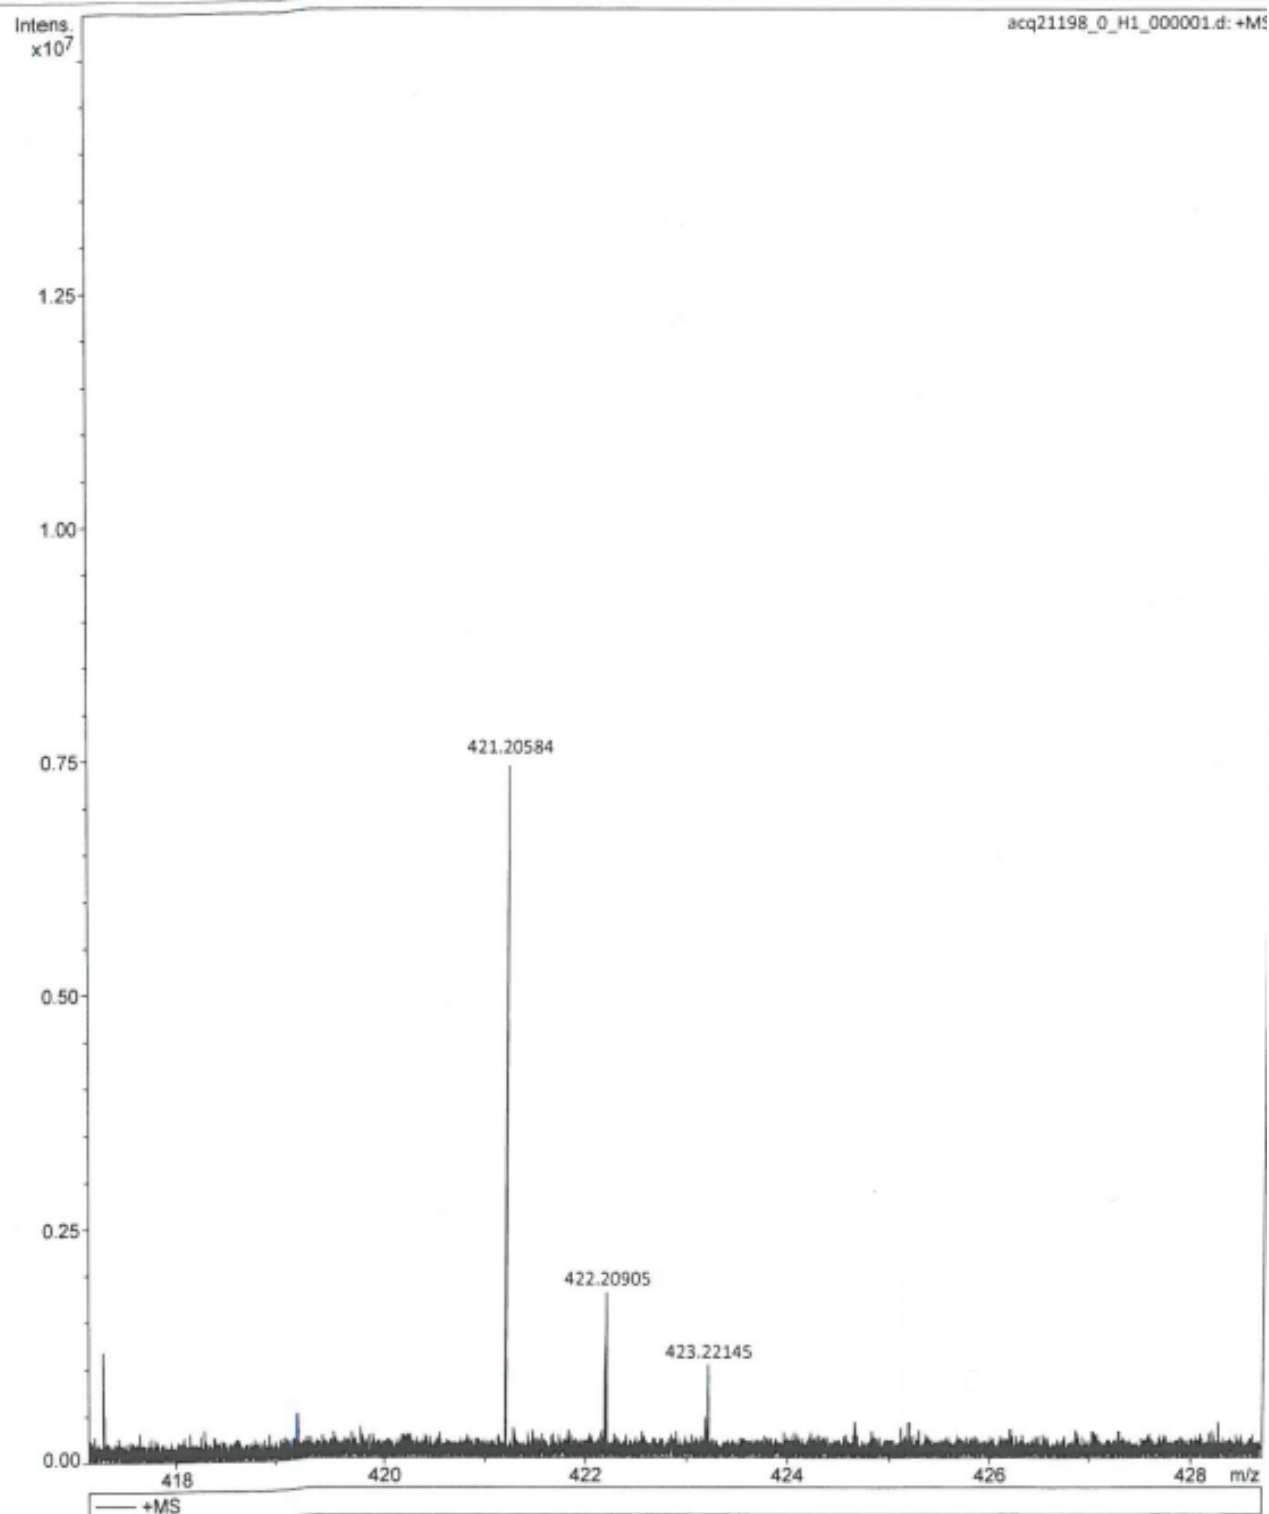

Figure S27. HRMS spectrum of compound **7a**



## Generic Display Report

### Analysis Info

Analysis Name S:\fticr0\rod\analyser-routine\acq21200\_0\_J1\_000001.d  
Method 10800  
Sample Name  
Comment

Acquisition Date 7/6/2022 7:13:14 AM

Operator  
Instrument solariX XR

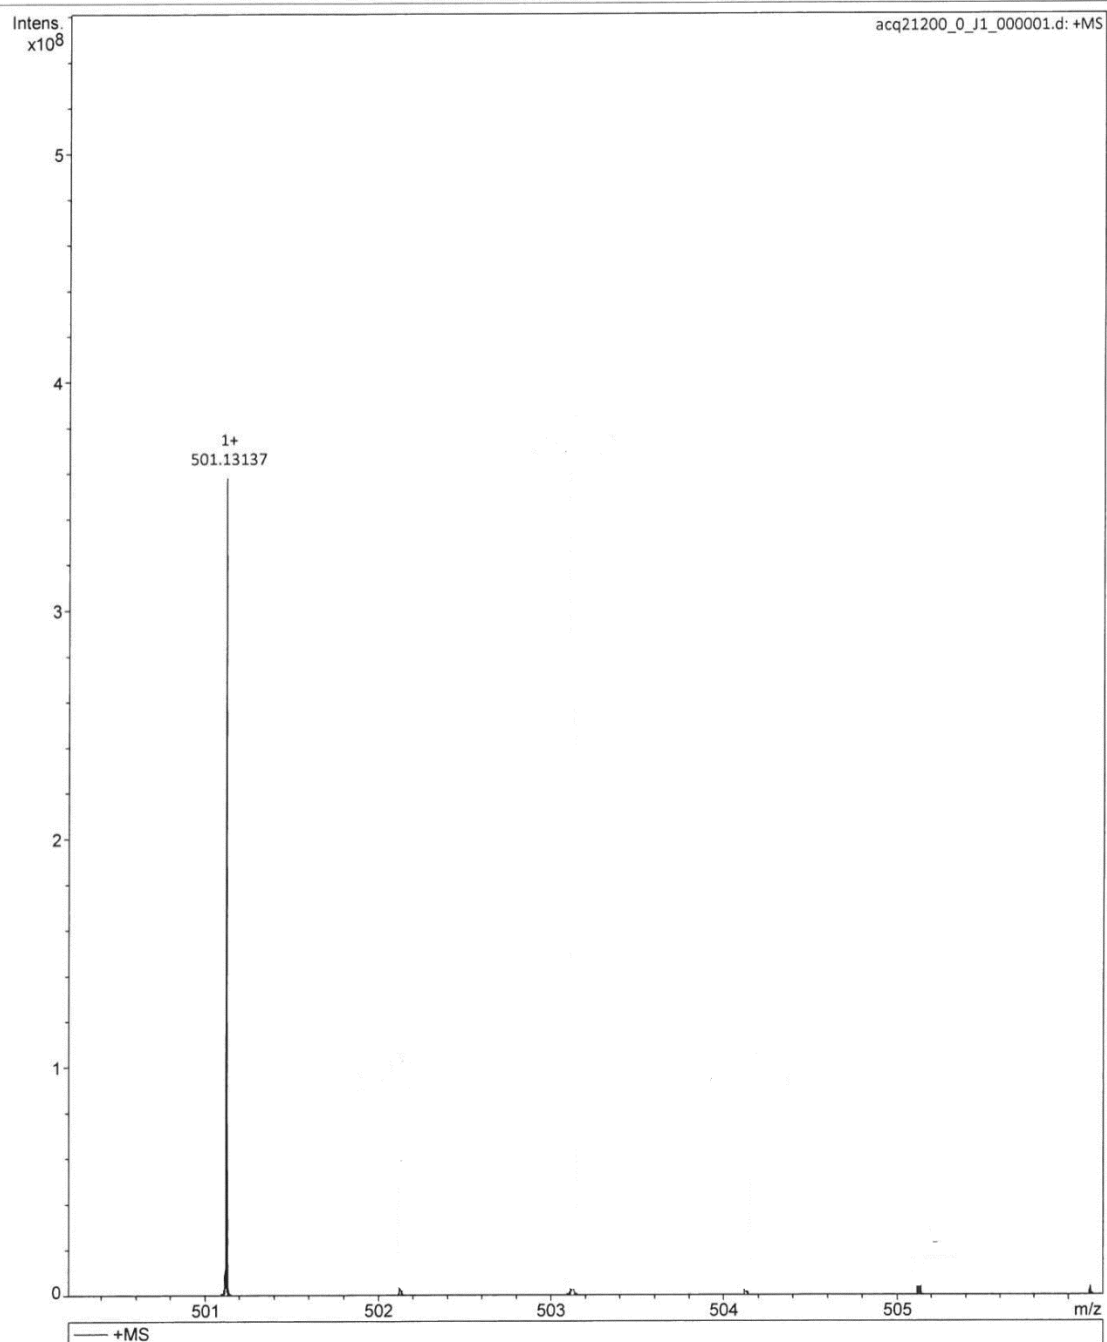

**Figure S28.** HRMS spectrum of compound **7b**

## Generic Display Report

### Analysis Info

Analysis Name S:\fticr0\rod\analyser-routine\acq21204\_0\_N1\_000001.d  
Method 10800  
Sample Name  
Comment

Acquisition Date 7/6/2022 7:18:20 AM

Operator  
Instrument solarix XR

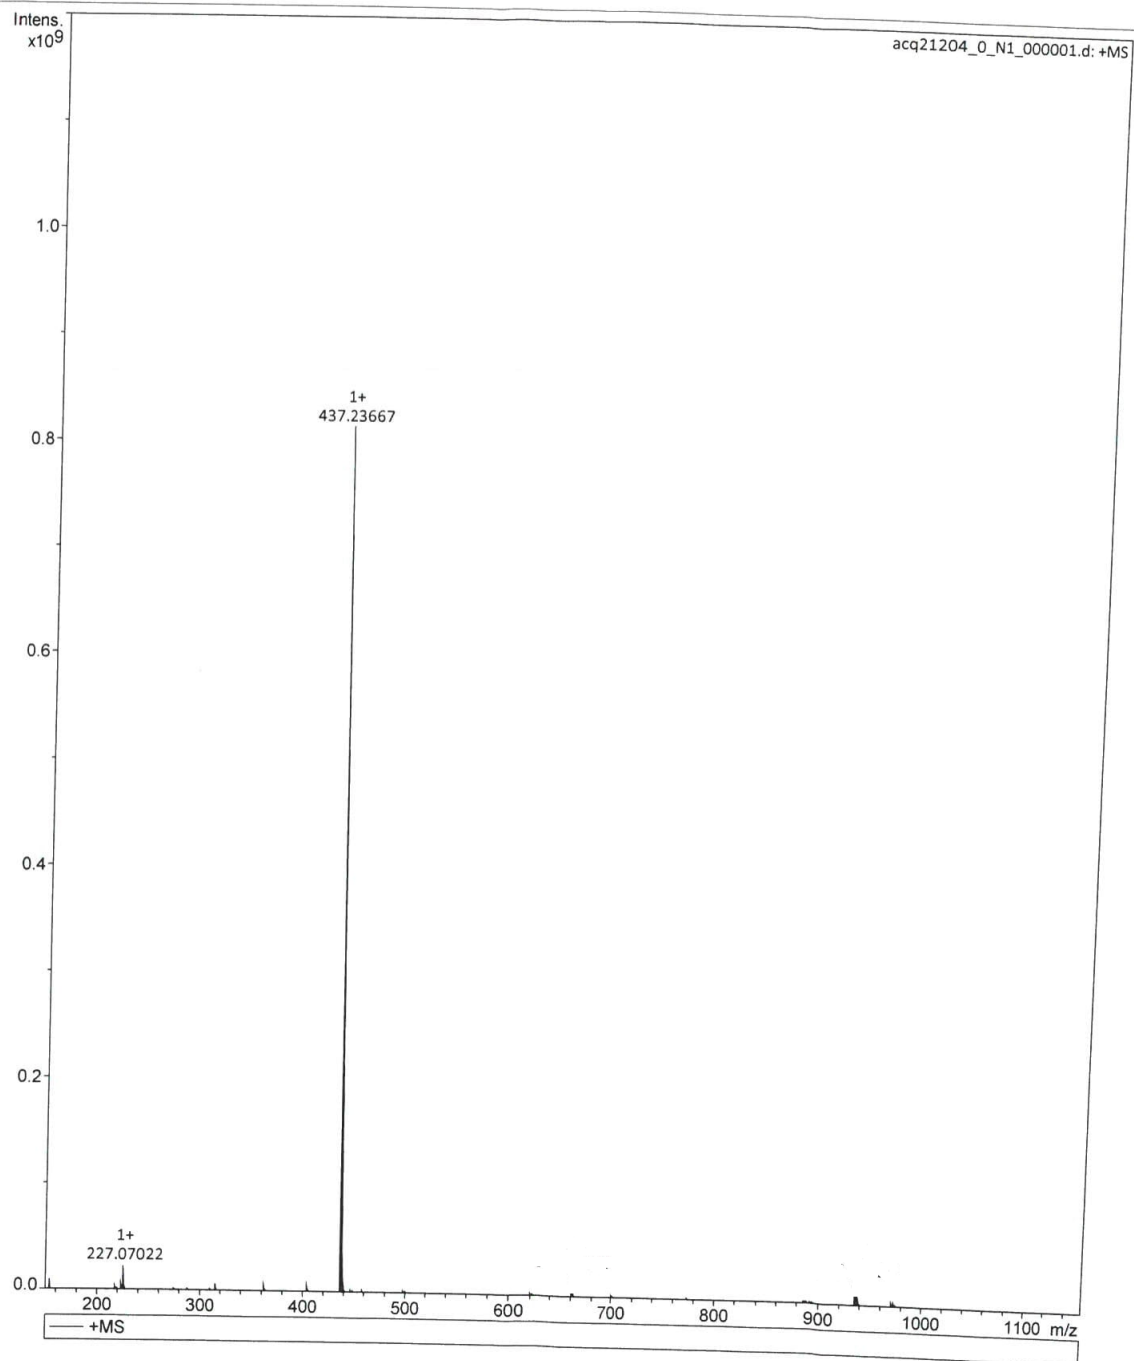

Figure S29. HRMS spectrum of compound 7c

## Generic Display Report

### Analysis Info

Analysis Name S:\fticr0\rod\analyser-routine\acq21199\_0\_l1\_000001.d  
Method 10800  
Sample Name  
Comment

Acquisition Date 7/6/2022 7:12:06 AM

Operator  
Instrument solariX XR

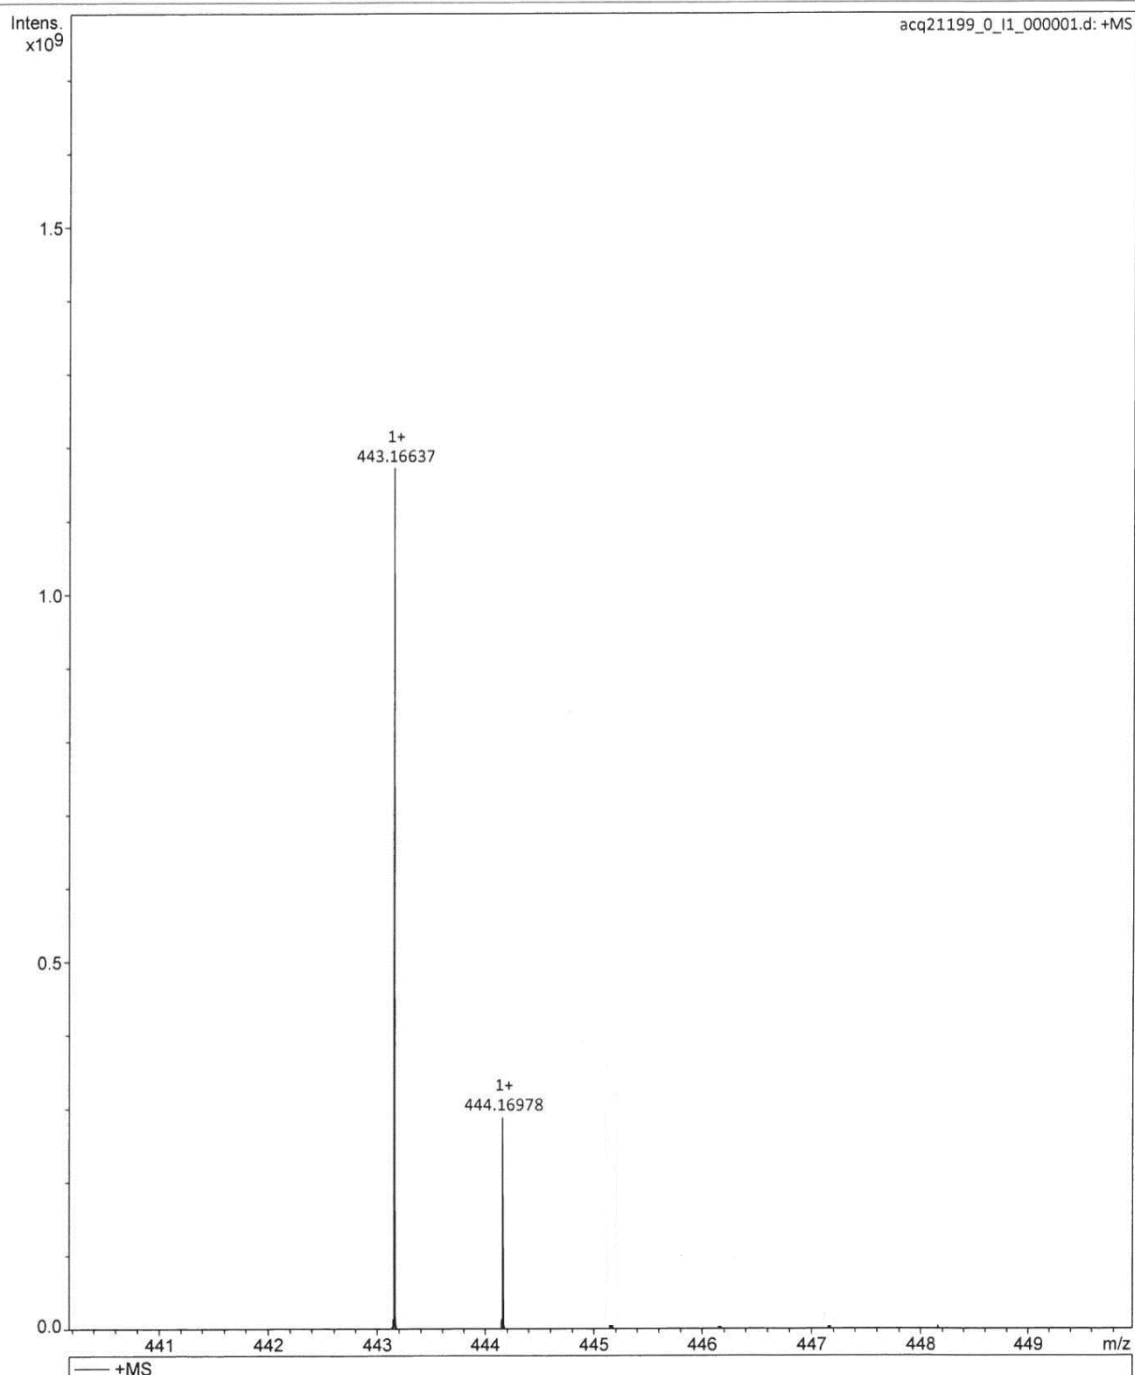

**Figure S30.** HRMS spectrum of compound **7d**

## Generic Display Report

### Analysis Info

Analysis Name S:\fticr0\rod\analyser-routine\acq21203\_0\_M1\_000001.d  
Method 10800  
Sample Name  
Comment

Acquisition Date 7/6/2022 7:16:58 AM

Operator  
Instrument solarix XR

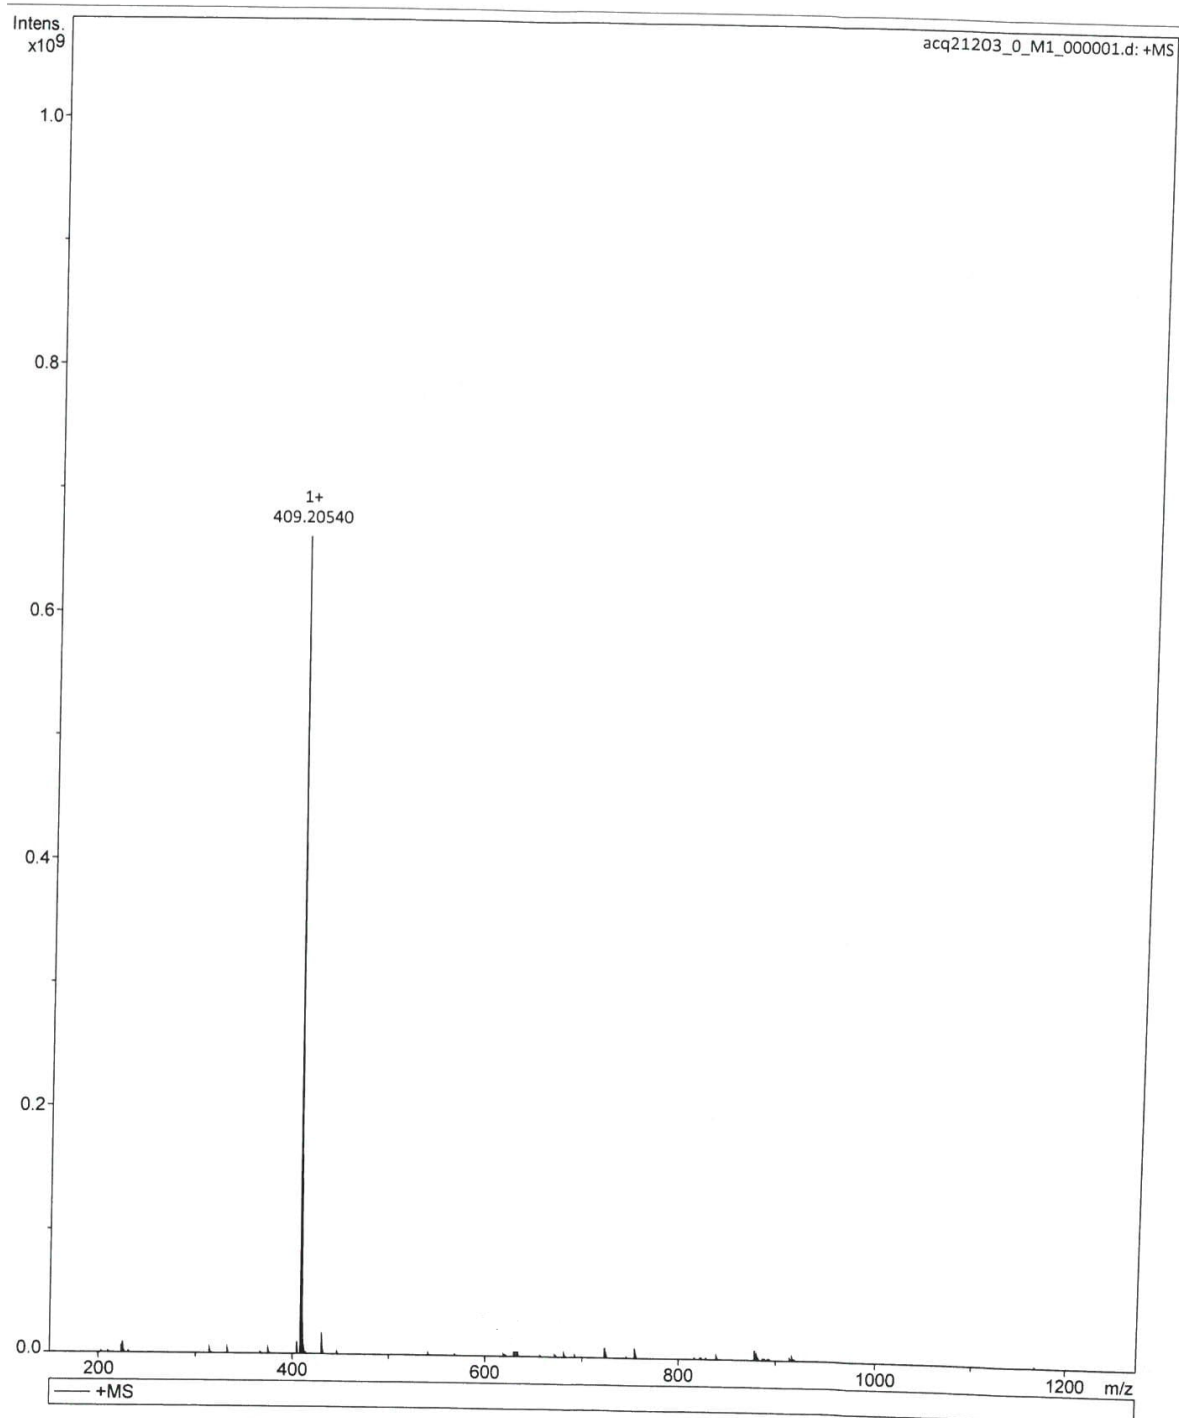

**Figure S31.** HRMS spectrum of compound **7e**

## Generic Display Report

### Analysis Info

Analysis Name S:\fticr0\rod\analyser-routine\acq21205\_0\_01\_000001.d  
Method 10800

Sample Name

Comment

Acquisition Date 7/6/2022

Operator

Instrument solariX XR

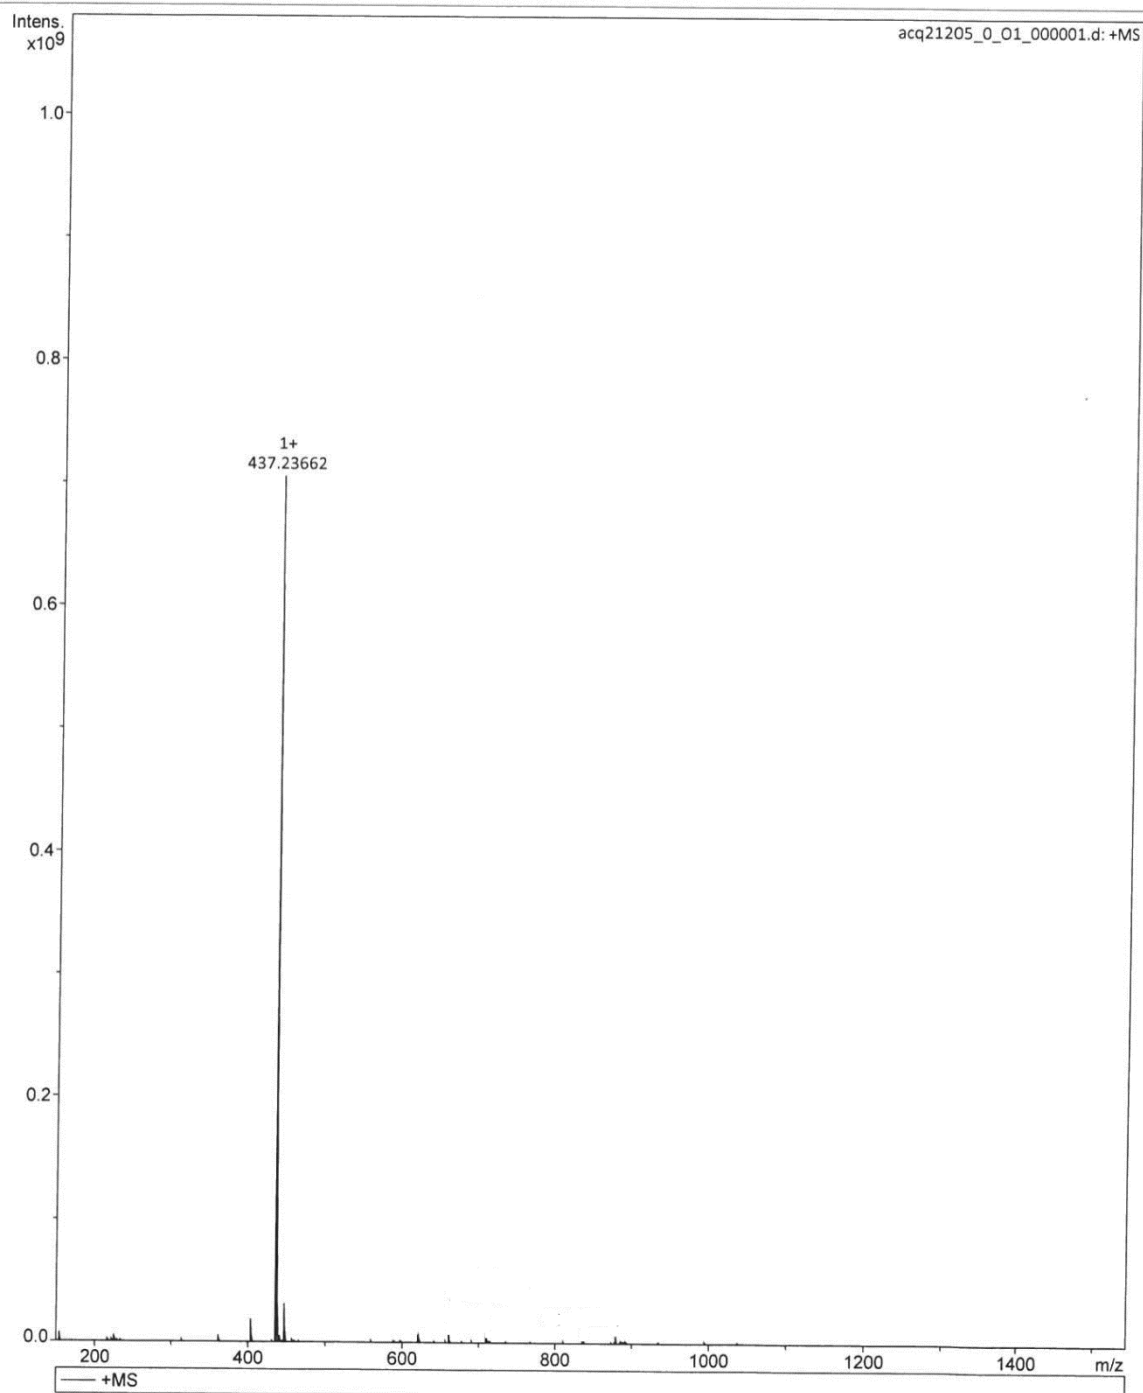

**Figure S32.** HRMS spectrum of compound **7f**
